# Supplementary material
Source: PubMed Central journal article supplement (PMC3059850)
Supplement: NIHMS248700-supplement-J_Am_Chem_Soc__Supporting_Information.pdf [file NIHMS248700-supplement-J_Am_Chem_Soc__Supporting_Information.pdf]

# Enantioselective Synthesis of $\alpha,\alpha$ -Disubstituted Cyclopentenes by an *N*-Heterocyclic Carbene-Catalyzed Desymmetrization of 1,3-Diketones

Manabu Wadamoto, Eric M. Phillips, Troy E. Reynolds and Karl A. Scheidt\*

Department of Chemistry, Northwestern University,  
2145 Sheridan Road, Evanston, Illinois 60208

## Supporting Information

### Table of Contents

|                                                                     |    |
|---------------------------------------------------------------------|----|
| <i>General Information</i> .....                                    | 2  |
| <i>General Procedure for Desymmetrization of 1,3-Diketone</i> ..... | 2  |
| <i>X-ray crystal structure of cinnamaldehyde dimer 3:</i> .....     | 6  |
| <i>Stereochemical Determination of 12 and 13</i> .....              | 7  |
| <i>Determination of Absolute Stereochemistry of 4</i> .....         | 8  |
| <i>Selected NMR Spectra</i> .....                                   | 9  |
| <i>HPLC and GC Data</i> .....                                       | 29 |

### General Information

All reactions were carried out under a nitrogen atmosphere in flame-dried glassware with magnetic stirring.  $\text{CH}_2\text{Cl}_2$  was purified by passage through a bed of activated alumina.<sup>1</sup> Reagents were purified prior to use unless otherwise stated following the guidelines of Perrin and Armarego.<sup>2</sup> Purification of reaction products was carried out by flash chromatography using EM Reagent silica gel 60 (230-400 mesh). Analytical thin layer chromatography was performed on EM Reagent 0.25 mm silica gel 60-F plates. Visualization was accomplished with UV light and ceric ammonium nitrate stain or potassium permanganate stain followed by heating. Infrared spectra were recorded on a Perkin Elmer 1600 series FT-IR spectrometer.  $^1\text{H-NMR}$  spectra were recorded on a Varian Inova 500 (500 MHz) spectrometer and are reported in ppm using solvent as an internal standard ( $\text{CDCl}_3$  at 7.26 ppm). Data are reported as (ap = apparent, s = singlet, d = doublet, t = triplet, q = quartet, m = multiplet, b = broad; coupling constant(s) in Hz; integration. Proton-decoupled  $^{13}\text{C-NMR}$  spectra were recorded on a Varian Inova 500 (125 MHz) spectrometer and are reported in ppm using solvent as an internal standard ( $\text{CDCl}_3$  at 77.0 ppm). Mass spectra data were obtained on a Varian 1200 Quadrupole Mass Spectrometer and Micromass Quadro II Spectrometer.

### General Procedure for Desymmetrization of 1,3-Diketone

To an oven dried 10 mL round bottom flask containing a magnetic stirring bar was added azolium salt **D** (4.2 mg, 0.01 mmol) and the corresponding enal 1,3-diketone (0.1 mmol) in dry box. The heterogeneous mixture was then diluted with  $\text{CH}_2\text{Cl}_2$  (2 mL, 0.05 M). Once the material dissolved, diisopropylethylamine (17  $\mu\text{L}$ , 0.1 mmol) was added via syringe. The reaction was stirred at 40 °C under  $\text{N}_2$  atmosphere until consumption of diketone was observed by TLC. The reaction mixture was diluted with hexane and applied directly to a silica gel column to provide the pure cyclopentene.

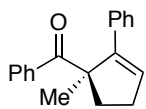

#### **(R)-(1-methyl-2-phenylcyclopent-2-enyl)(phenyl)methanone (4):**

Prepared according to general procedure using (*E*)-5-methyl-6-oxo-6-phenyl-5-(phenylcarbonyl)hex-2-enal (92 mg, 0.3 mmol), azolium salt (15 mg, 0.03 mmol) diisopropylethylamine (54  $\mu\text{L}$ , 0.3 mmol) to afford 63 mg (80%) of **4** as a colorless oil. Analytical data for **4**: IR (film) 3057, 2962, 2929, 2847, 1670, 1596, 1496, 1446, 1372, 1261, 1240, 1172, 976, 758, 692  $\text{cm}^{-1}$ ;  $^1\text{H NMR}$  (500 MHz,  $\text{CDCl}_3$ )  $\delta$  7.98 (d,  $J = 7.7$  Hz, 2H), 7.40 (t,  $J = 7.3$  Hz, 1H), 7.34-7.38 (m, 4H), 7.21 (t,  $J = 7.3$  Hz, 2H), 7.15 (m, 1H), 6.36 (s, 1H), 2.73-2.60 (m, 3H), 1.99-1.97 (m, 1H), 1.55 (s, 3H);  $^{13}\text{C NMR}$  (125 MHz,  $\text{CDCl}_3$ )  $\delta$  205.0, 148.6, 137.5, 135.2, 132.0, 129.3, 128.9, 128.7, 128.3, 127.5, 126.5, 62.1, 39.0, 31.1, 24.1; GCMS (CI); Exact mass calcs for  $\text{C}_{19}\text{H}_{18}\text{O}$   $[\text{M}]^+$ , 262.14 Found  $[\text{M} + \text{H}]$ , 263;  $[\alpha]_{\text{D}}$  : +229.0 ( $\text{CHCl}_3$ ,  $c = 1.0$ ,  $er = 96.5 : 3.5$ ). Enantiomeric ratio

1. Pangborn, A. B.; Giardello, M. A.; Grubbs, R. H.; Rosen, R. K.; Timmers, F. J. *Organometal.* **1996**, *15*, 1518-1520.
2. Perrin, D. D. and Armarego, W. L. *Purification of Laboratory Chemicals*; 3rd Ed., Pergamon Press, Oxford. 1988.

was measured by chiral HPLC (Chiralcel OD-H, 3% IPA/Hexanes, 1mL/min,  $R_{t_{\text{major}}} = 5.87$ ,  $R_{t_{\text{minor}}} = 9.22$ ).

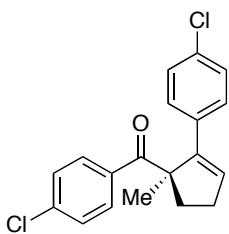

**(R)-(4-chlorophenyl)(2-(4-chlorophenyl)-1-methylcyclopent-2-enyl)methanone (5):** Prepared according to general procedure using (*E*)-6-(4-chlorophenyl)-5-(4-chlorophenylcarbonyl)-5-methyl-6-oxohex-2-enal (38 mg, 0.1 mmol), azolium salt (5 mg, 0.01 mmol) diisopropylethylamine (17  $\mu\text{L}$ , 0.1 mmol) to afford 25 mg (76%) of **5** as a colorless oil. Analytical data for **5**: IR (film) 3445, 3026, 2957, 2931, 2860, 1684, 1496, 1455, 1377, 1181, 1049, 748, 699  $\text{cm}^{-1}$ ;  $^1\text{H}$  NMR (500 MHz,  $\text{CDCl}_3$ )  $\delta$  7.92 (d,  $J = 8.6$  Hz, 2H), 7.27 (d,  $J = 8.4$  Hz, 2H), 7.22 (d,  $J = 8.6$  Hz, 2H), 7.16 (d,  $J = 8.6$  Hz, 2H), 6.37 (d,  $J = 2.2$  Hz, 1H), 2.76-2.57 (m, 3H), 2.03-2.57 (m, 1H), 1.53 (s, 3H);  $^{13}\text{C}$  NMR (125 MHz,  $\text{CDCl}_3$ )  $\delta$  203.2, 147.6, 138.7, 135.2, 133.4, 133.3, 130.8, 129.5, 129.0, 128.7, 127.6, 612.0, 38.9, 31.1, 23.8; GCMS (CI): Exact mass calcd for  $\text{C}_{19}\text{H}_{16}\text{Cl}_2\text{O}$   $[\text{M}]^+$ , 330.06. Found  $[\text{M}+\text{Na}]$ , 331;  $[\alpha]_{\text{D}}$ : +20.6 (MeOH,  $c = 1.0$ ,  $er = 97:3$ ). Enantiomeric ratio was measured by HPLC (Chiralcel OD-H, 5% IPA/Hexanes, 1mL/min,  $R_{t_1} = 6.95$ ,  $R_{t_2} = 7.97$ ).

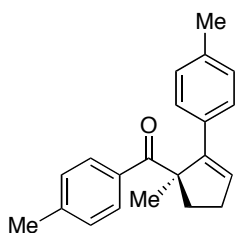

**(R)-(1-methyl-2-*p*-tolylcyclopent-2-enyl)(*p*-tolyl)methanone (6):** Prepared according to general procedure using (*E*)-5-methyl-5-(4-methylphenylcarbonyl)-6-oxo-6-*p*-tolylhex-2-enal (33 mg, 0.1 mmol), azolium salt (5 mg, 0.01 mmol) diisopropylethylamine (17  $\mu\text{L}$ , 0.1 mmol) to afford 17 mg (60%) of **6** as a colorless oil. Analytical data for **6**: IR (film) 2924, 2848, 1666, 1606, 1512, 1545, 1371, 1265, 1242, 1172, 991, 976, 813  $\text{cm}^{-1}$ ;  $^1\text{H}$  NMR (500 MHz,  $\text{CDCl}_3$ )  $\delta$  7.92 (d,  $J = 8.1$  Hz, 2H), 7.22 (d,  $J = 8.1$  Hz, 2H), 7.09 (d,  $J = 8.05$  Hz, 2H), 7.00 (d,  $J = 7.9$  Hz, 2H), 6.31 (s, 1H), 2.72-2.58 (m, 3H), 2.31 (s, 3H), 2.25 (s, 3H), 1.98-1.94 (m, 1H), 1.52 (s, 3H);  $^{13}\text{C}$  NMR (125 MHz,  $\text{CDCl}_3$ )  $\delta$  204.5, 148.8, 142.6, 137.2, 134.7, 132.3, 129.5, 129.4, 129.0, 127.5, 126.4, 62.0, 39.1, 31.0, 24.0, 21.7, 21.3; GCMS (electrospray): Exact mass calcd for  $\text{C}_{21}\text{H}_{22}\text{O}$   $[\text{M}]^+$ , 290.17. Found  $[\text{M}+\text{H}]$ , 291;  $[\alpha]_{\text{D}}$ : +183 ( $c=1.0$ ,  $\text{CHCl}_3$ ,  $er = 97:3$ ), Enantiomeric ratio was measured by HPLC (Chiralcel AD-H, 3% IPA/Hexanes, 1mL/min,  $R_{t_{\text{major}}} = 4.71$ ,  $R_{t_{\text{minor}}} = 5.27$ ).

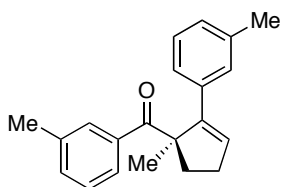

**(R)-(1-methyl-2-*m*-tolylcyclopent-2-enyl)(*m*-tolyl)methanone (7):** Prepared according to general procedure using (*E*)-5-methyl-5-(4-methylphenylcarbonyl)-6-oxo-6-*m*-tolylhex-2-enal (33 mg, 0.1 mmol), azolium salt (5 mg, 0.01 mmol) diisopropylethylamine (17  $\mu\text{L}$ , 0.1 mmol) to afford 19 mg (65%) of **7** as a colorless oil. Analytical data for **7**: IR (film) 2924, 2845, 1668, 1599, 1486, 1454, 1370, 1267, 1156, 1092, 782, 732  $\text{cm}^{-1}$ ;  $^1\text{H}$  NMR (500 MHz,  $\text{CDCl}_3$ )  $\delta$  7.76 (d,  $J = 7.3$  Hz, 2H), 7.22 (d,  $J = 7.3$  Hz, 1H), 7.18-7.15 (m, 2H), 7.11 (d,  $J = 4.4$  Hz, 2H), 6.98 (m, 1H), 6.35-6.34 (m, 1H), 2.72-2.58 (m, 3H), 2.33 (s, 3H), 2.28 (s, 3H), 2.00-1.96 (m, 1H), 1.55 (s, 3H);  $^{13}\text{C}$  NMR (125 MHz,  $\text{CDCl}_3$ )  $\delta$  205.4,

148.7, 138.1, 138.0, 137.6, 135.2, 132.7, 129.9, 128.7, 128.6, 128.3, 128.0, 127.3, 126.3, 123.6, 62.9, 38.9, 31.0, 24.2, 21.7, 21.7; GCMS (electrospray): Exact mass calcd for  $C_{21}H_{22}O$   $[M]^+$ , 290.17. Found  $[M+H]$ , 291;  $[\alpha]_D$ : +183 (c=1.0,  $CHCl_3$ , er = 97:3), Enantiomeric ratio was measured by HPLC (Chiralcel AD-H, 3% IPA/Hexanes, 1mL/min,  $Rt_{major}$  = 5.29,  $Rt_{minor}$  = 5.93).

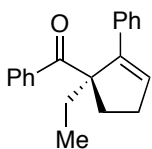

**(R)-(1-ethyl-2-phenylcyclopent-2-enyl)(phenyl)methanone (8):** Prepared according to general procedure using (*E*)-5,5-di(phenylcarbonyl)hept-2-enal (35 mg, 0.1 mmol), azolium salt (5 mg, 0.01 mmol) diisopropylethylamine (17  $\mu$ L, 0.1 mmol) to afford 20 mg (73%) of **8** as a colorless oil. Analytical data for **8**: IR (film) 3054, 2962, 2846, 1668, 1596, 1444, 1258, 1260, 1168, 1075, 1026, 985, 827, 764, 691  $cm^{-1}$ ;  $^1H$  NMR (500 MHz,  $CDCl_3$ )  $\delta$  7.96 (d,  $J$  = 7.3 Hz, 2H), 7.44-7.42 (m, 1H), 7.35-7.16 (m, 7H), 6.44 (s, 1H), 2.68-2.63 (m, 2H), 2.55-2.51 (m, 1H), 2.15-2.11 (m, 1H), 2.02 (q,  $J$  = 7.8 Hz, 2H), 0.81 (t,  $J$  = 7.8 Hz, 3H);  $^{13}C$  NMR (125 MHz,  $CDCl_3$ )  $\delta$  205.4, 145.6, 138.5, 125.7, 131.8, 131.6, 128.9, 128.7, 128.3, 127.5, 126.7, 66.3, 34.6, 32.2, 28.6, 8.2; MS (CI): Exact mass calcd for  $C_{20}H_{20}O$   $[M]^+$ , 276.15. Found  $[M+H]$ , 297;  $[\alpha]_D$ : +63.6 ( $CHCl_3$ , c = 1.0, er = 95:5). Enantiomeric ratio was measured by HPLC (Chiralcel AD-H, 3% IPA/Hexanes, 1mL/min,  $Rt_{major}$  = 6.23,  $Rt_{minor}$  = 8.02).

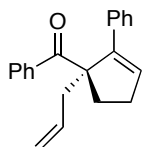

**(R)-(1-allyl-2-phenylcyclopent-2-enyl)(phenyl)methanone (9):** Prepared according to general procedure using (*E*)-5,5-di(phenylcarbonyl)octa-2,7-dienal (33 mg, 0.1 mmol), azolium salt (5 mg, 0.01 mmol) diisopropylethylamine (17  $\mu$ L, 0.1 mmol) to afford 20 mg (70%) of **9** as a colorless oil. Analytical data for **9**: IR (film) 3064, 2925, 1668, 1445, 1239, 1179, 1102, 1070, 1000, 917, 698  $cm^{-1}$ ;  $^1H$  NMR (500 MHz,  $CDCl_3$ )  $\delta$  7.98 (d,  $J$  = 7.3 Hz, 2H), 7.44 (t,  $J$  = 7.3 Hz, 1H), 7.35-7.17 (m, 7H), 6.42 (t,  $J$  = 2.4 Hz, 1H), 5.77-5.69 (m, 1H), 5.06-5.02 (m, 2H), 2.75-2.72 (t,  $J$  = 7.8 Hz, 2H), 2.62-2.60 (m, 2H), 2.57-2.47 (m, 1H), 2.24-2.20 (m, 1H);  $^{13}C$  NMR (125 MHz,  $CDCl_3$ )  $\delta$  204.6, 146.0, 138.1, 135.4, 134.8, 132.0, 131.6, 129.0, 128.7, 128.4, 127.6, 126.8, 118.1, 65.9, 40.6, 34.5, 31.9; MS (CI): Exact mass calcd for  $C_{21}H_{20}O$   $[M]^+$ , 288.15. Found  $[M+H]$ , 289;  $[\alpha]_D$ : +223 ( $CHCl_3$ , c = 1.0, er = 91.5:8.5). Enantiomeric ratio was measured by HPLC (Chiralcel AD-H, 3% IPA/Hexanes, 1mL/min,  $Rt_{major}$  = 5.28,  $Rt_{minor}$  = 6.23).

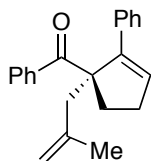

**(R)-(1-(2-methylallyl)-2-phenylcyclopent-2-enyl)(phenyl)methanone (10):** Prepared according to general procedure using (*E*)-7-methyl-5,5-di(phenylcarbonyl)octa-2,7-dienal (33 mg, 0.1 mmol), azolium salt (5 mg, 0.01 mmol) diisopropylethylamine (17  $\mu$ L, 0.1 mmol) to afford 21 mg (69%) of **10** as a colorless oil. Analytical data for **10**: IR (film) 3066, 2918, 2846, 1669, 1596, 1495, 1444, 1227, 1165, 1073, 982, 892, 761, 693  $cm^{-1}$ ;  $^1H$  NMR (500 MHz,  $CDCl_3$ )  $\delta$  7.88 (d,  $J$  = 7.3 Hz, 2H), 7.41 (t,  $J$  = 7.3 Hz, 1H), 7.37-7.18 (m, 7H), 6.43 (t,  $J$  = 2.4 Hz, 1H), 4.83 (s, 1H), 4.67 (s, 1H), 2.99 (d,  $J$  = 4.2 Hz, 1H),

2.71-2.65 (m, 2H), 2.57-2.52 (m, 2H), 2.41-2.38 (m, 1H), 1.65 (s, 3H);  $^{13}\text{C}$  NMR (125 MHz,  $\text{CDCl}_3$ )  $\delta$  205.3, 146.5, 143.4, 138.5, 135.0, 132.0, 131.7, 128.9, 128.7, 128.2, 127.5, 126.9, 115.1, 65.8, 43.5, 34.5, 31.9, 24.8; GCMS (CI): Exact mass calcd for  $\text{C}_{22}\text{H}_{22}\text{O}$   $[\text{M}]^+$ , 302.17. Found  $[\text{M}+\text{H}]$ , 303;  $[\alpha]_{\text{D}}$ : +50.9 ( $\text{CHCl}_3$ ,  $c = 1.0$ ,  $er = 91.5:8.5$ ). Enantiomeric ratio was measured by HPLC (Chiralcel AD-H, 3% IPA/Hexanes, 1mL/min,  $\text{Rt}_{\text{major}} = 6.62$ ,  $\text{Rt}_{\text{minor}} = 8.37$ ).

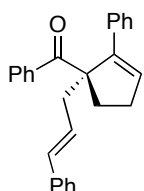

**(R,E)-(1-cinnamyl-2-phenylcyclopent-2-enyl)(phenyl)methanone (11):**

Prepared according to general procedure using (2*E*,7*E*)-8-phenyl-5,5-di(phenylcarbonyl)octa-2,7-dienal (33 mg, 0.1 mmol), azolium salt (5 mg, 0.01 mmol) diisopropylethylamine (17  $\mu\text{L}$ , 0.1 mmol) to afford 23 mg (64%) of **11** as a colorless oil. Analytical data for **11**: IR (film) 3445, 3026, 2957, 2931, 2860, 1684, 1496, 1455, 1377, 1181, 1049, 748, 699  $\text{cm}^{-1}$ ;  $^1\text{H}$  NMR (500 MHz,  $\text{CDCl}_3$ )  $\delta$  8.01 (d,  $J = 7.7$  Hz, 2H), 7.44 (t,  $J = 7.5$  Hz, 1H), 7.36-7.19 (m, 12H), 6.44 (bs, 1H), 6.37 (d,  $J = 16$  Hz, 1H), 6.17-6.11 (m, 1H), 2.92 (t,  $J = 8.4$ , 2H) 2.61-2.50 (m, 3H), 2.28-2.23 (m, 1H);  $^{13}\text{C}$  NMR (125 MHz,  $\text{CDCl}_3$ )  $\delta$  204.5, 146.2, 138.1, 138.0, 135.4, 133.2, 131.6, 129.1, 128.8, 128.7, 128.4, 127.7, 127.2, 126.9, 126.7, 126.3, 66.0, 39.7, 34.9, 31.9; GCMS (CI): Exact mass calcd for  $\text{C}_{27}\text{H}_{24}\text{O}$   $[\text{M}]^+$ , 364.18. Found  $[\text{M}+\text{H}]$ , 365;  $[\alpha]_{\text{D}}$ : +65.2 ( $\text{CHCl}_3$ ,  $c = 1.0$ ,  $er = 91:9$ ). Enantiomeric ratio was measured by HPLC (Chiralcel AD-H, 5% IPA/Hexanes, 1mL/min,  $\text{Rt}_{\text{minor}} = 8.89$ ,  $\text{Rt}_{\text{major}} = 9.70$ ).

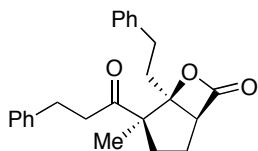

**(1R,4S,5R)-4-methyl-5-phenethyl-4-(3-phenylpropanoyl)-6-**

**oxabicyclo[3.2.0]heptan-7-one (12):** Prepared according to general procedure using (*E*)-5-methyl-6-oxo-8-phenyl-5-(3-phenylpropanoyl)oct-2-enal (33 mg, 0.1 mmol), azolium salt (10 mg, 0.02 mmol) diisopropylethylamine (17  $\mu\text{L}$ , 0.1 mmol) to afford 23 mg (65%) of **12** as a colorless oil. Analytical data for **12**: IR (film) 3445, 3026, 2957, 2931, 2860, 1684, 1496, 1455, 1377, 1181, 1049, 748, 699  $\text{cm}^{-1}$ ;  $^1\text{H}$  NMR (500 MHz,  $\text{CDCl}_3$ )  $\delta$  7.33–7.16 (m, 10H), 3.63 (d,  $J = 7.8$ , 1H), 3.00-2.94 (m, 1H), 2.88-2.81 (m, 3H), 2.78-2.71 (m, 2H), 2.31-2.24 (m, 1H), 2.15-2.09 (m, 1H), 1.90-1.81 (m, 2H), 1.78-1.71 (m, 2H), 1.27 (s, 3H);  $^{13}\text{C}$  NMR (125 MHz,  $\text{CDCl}_3$ )  $\delta$  211.3, 171.5, 141.1, 128.8, 128.8, 128.6, 128.6, 126.6, 126.5, 92.2, 59.4, 57.0, 40.7, 35.0, 32.3, 30.7, 30.0, 29.6, 24.1, 15.8; LRMS (electrospray): Exact mass calcd for  $\text{C}_{18}\text{H}_{26}\text{O}_2$   $[\text{M}]^+$ , 362.19. Found  $[\text{M}+\text{Na}]$ , 747.5;  $[\alpha]_{\text{D}}$ : -1.2 ( $\text{CHCl}_3$ ,  $c = 1.0$ ,  $er = 96:3$ ). Enantiomeric ratio was measured by HPLC (Chiralcel AD-H, 5% EtOH/Hexanes, 1mL/min,  $\text{Rt}_{\text{minor}} = 8.43$ ,  $\text{Rt}_{\text{major}} = 9.41$ ).

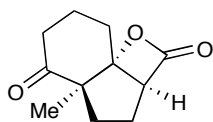

**(2aS, 4aS, 8aS)-4a-Methyl-hexahydro-1-oxacyclobuta[c]indene-**

**2,5-dione (13):** Prepared according to general procedure using (*E*)-4-(1-methyl-2,6-dioxocyclohexyl)but-2-enal (19 mg, 0.1 mmol), azolium salt (10 mg, 0.02 mmol) diisopropylamine (17  $\mu\text{L}$ , 0.1 mmol) to afford 10 mg (51%) of **13** as a white solid. Analytical data for **13**: IR (film) 3445, 3026, 2957, 2931, 2860, 1684, 1496, 1455, 1377, 1181, 1049, 748, 699  $\text{cm}^{-1}$ ;  $^1\text{H}$  NMR (500

MHz, CDCl<sub>3</sub>) δ 3.48 (d, *J* = 7.2 Hz, 1H), 2.77-2.73 (m, 1H), 2.58-2.52 (m, 1H), 2.39-2.33 (m, 2H), 2.27-2.24 (m, 1H), 2.13-2.10 (m, 1H), 1.98-1.94 (m, 1H), 1.64-1.56 (m, 2H), 1.55-1.40 (m, 1H), 1.29 (s, 3H); <sup>13</sup>C NMR (125 MHz, CDCl<sub>3</sub>) δ 210.4, 170.7, 89.6, 59.2, 58.9, 37.3, 32.1, 28.2, 24.8, 19.7, 18.5; LRMS (electrospray): Exact mass calcd for C<sub>11</sub>H<sub>14</sub>O<sub>3</sub> [M]<sup>+</sup>, 194.09. Found [2M+Na], 411.5; [α]<sub>D</sub> : -27.3 (CHCl<sub>3</sub>, c = 1.0, er = 97.5:2.5). Enantiomeric ratio was measured by GC (Beta Dex 225, 23.00 psi, 80 °C – 170 °C, Rt<sub>minor</sub> = 27.44, Rt<sub>major</sub> = 27.70).

### X-ray crystal structure of cinnamaldehyde dimer 3:

X-ray diffraction was performed at -120 °C and raw frame data were processed using SAINT. Molecular structure was solved using direct methods and refined by F2 by full-matrix least-squares techniques. The GOF = 0.836 for 549 variables refined to R1 = 0.0305 for 9531 reflections with I > 2σ(I). Further information is contained in the CIF file.

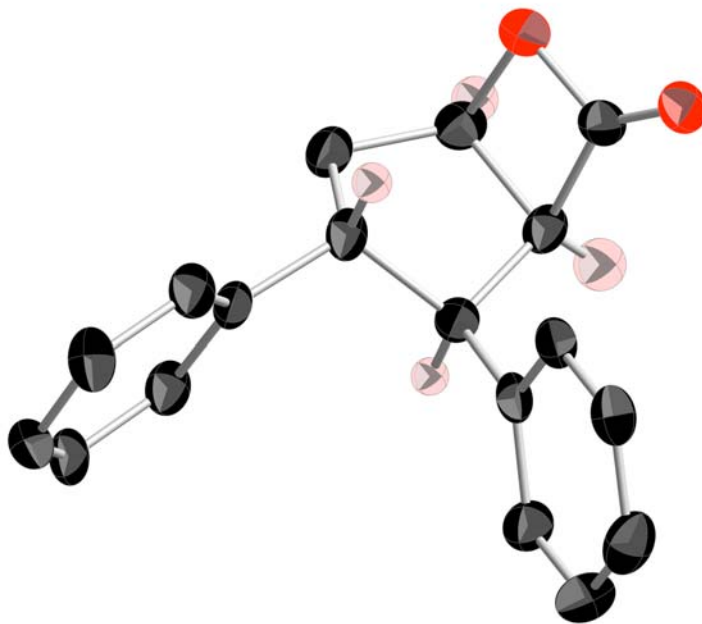

### Stereochemical Determination of **12** and **13**

Relative stereochemistry of compound **12** was determined by NOE experiment (Inova 500 MHz).

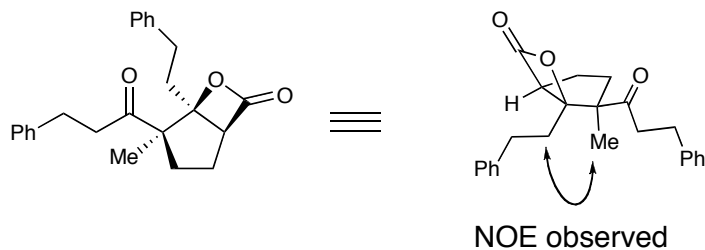

Relative stereochemistry of compound **13** was determined by X-ray diffraction.

**X-ray crystal structure 13:** X-ray diffraction was performed at  $-120\text{ }^{\circ}\text{C}$  and raw frame data were processed using SAINT. Molecular structure was solved using direct methods and refined by F2 by full-matrix least-squares techniques. The GOF = 1.655 for 261 variables refined to  $R1 = 0.1608$  for 3176 reflections with  $I > 2\sigma(I)$ . Further information is contained in the CIF file.

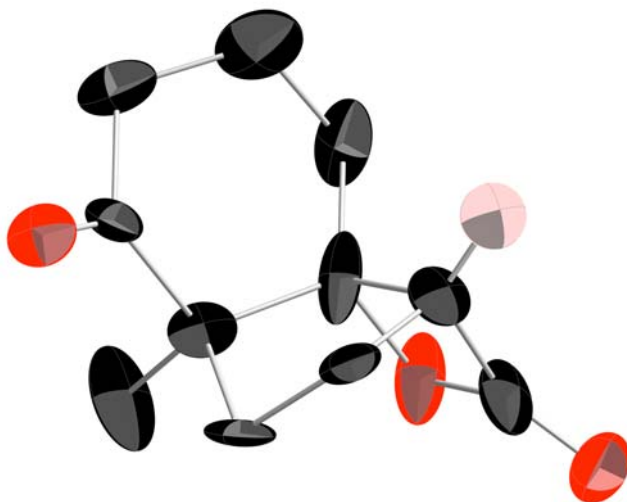

### Determination of Absolute Stereochemistry of **4**

The absolute stereochemistry of **4** was determined by the X-ray diffraction of a heavy atom derivative, (*R*)-((*R*)-1-methyl-2-phenylcyclopent-2-enyl)(phenyl)methyl 4-bromophenylcarbamate. This compound was synthesized by the method shown below.

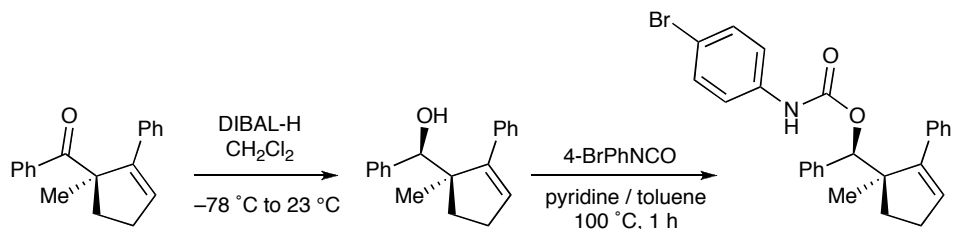

X-ray crystal structure of (*R*)-((*R*)-1-methyl-2-phenylcyclopent-2-enyl)(phenyl)methyl 4-bromophenylcarbamate:

X-ray diffraction was performed at -120 °C and raw frame data were processed using SAINT. Molecular structure was solved using direct methods and refined by F2 by full-matrix least-squares techniques. The GOF = 0.836 for 549 variables refined to R1 = 0.0305 for 9531 reflections with I > 2σ(I). Further information is contained in the CIF file.

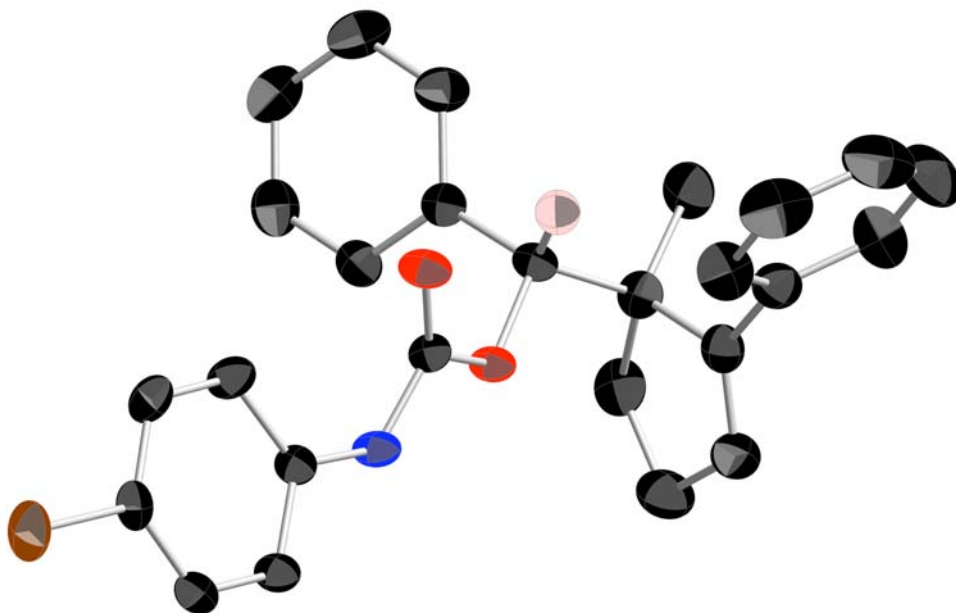



### Selected NMR Spectra

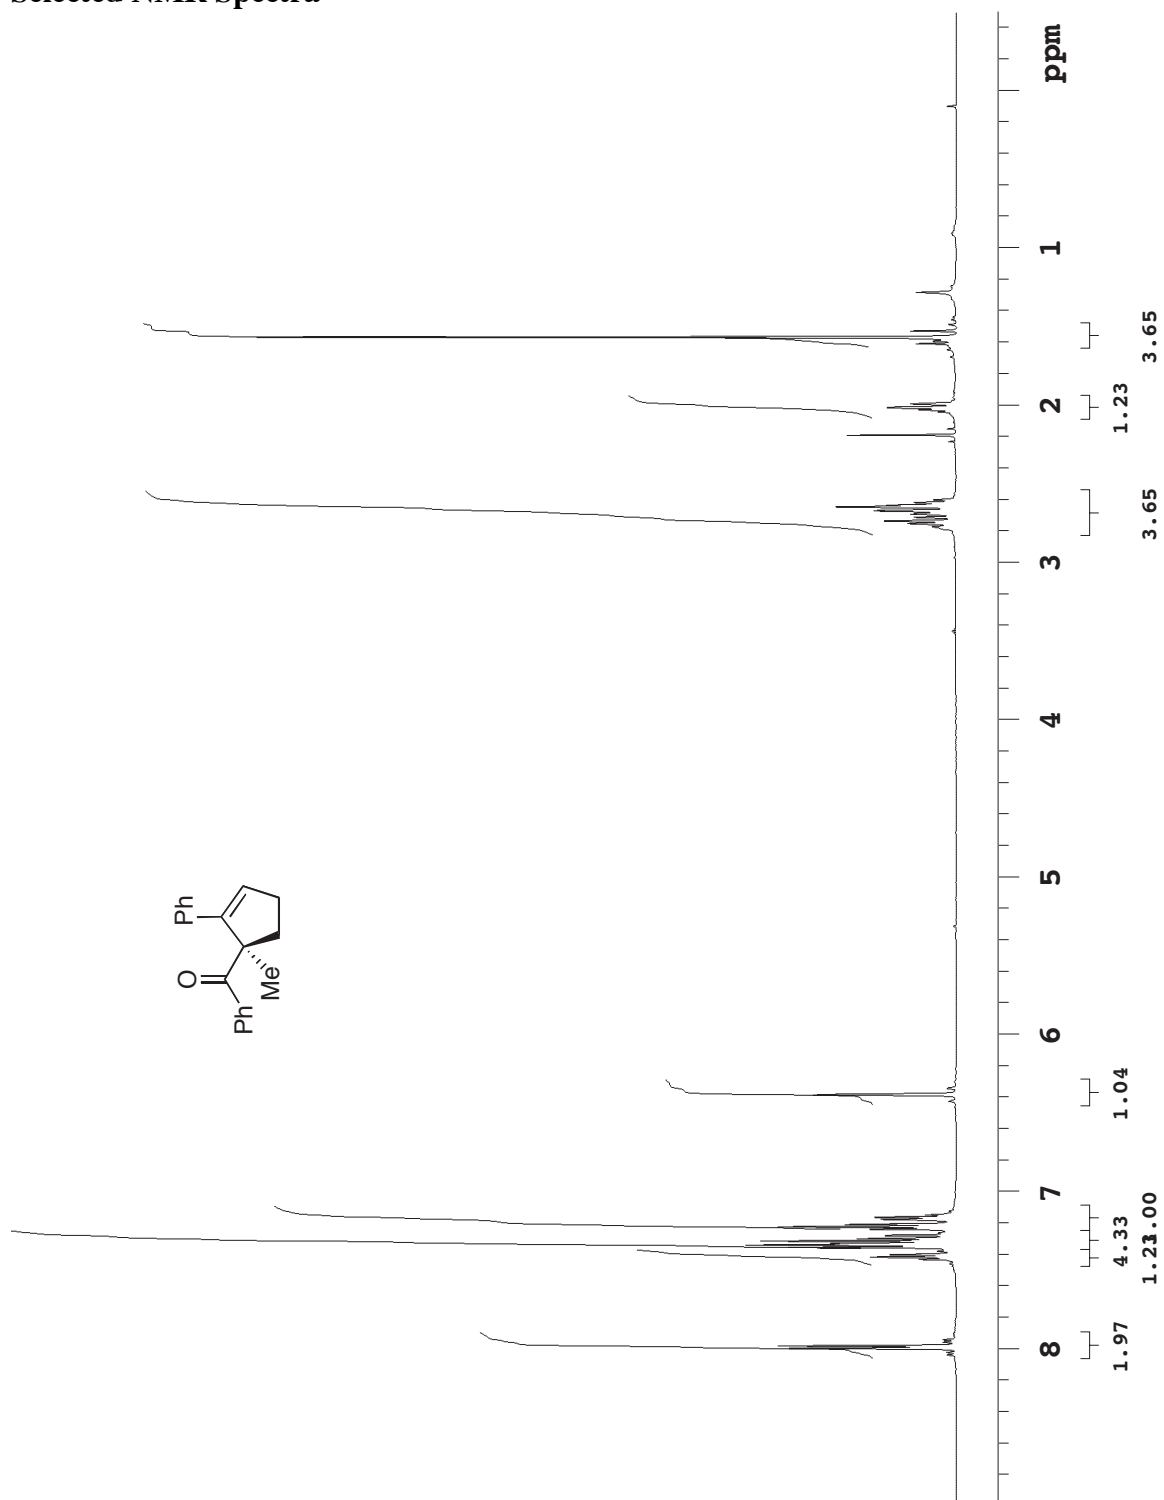

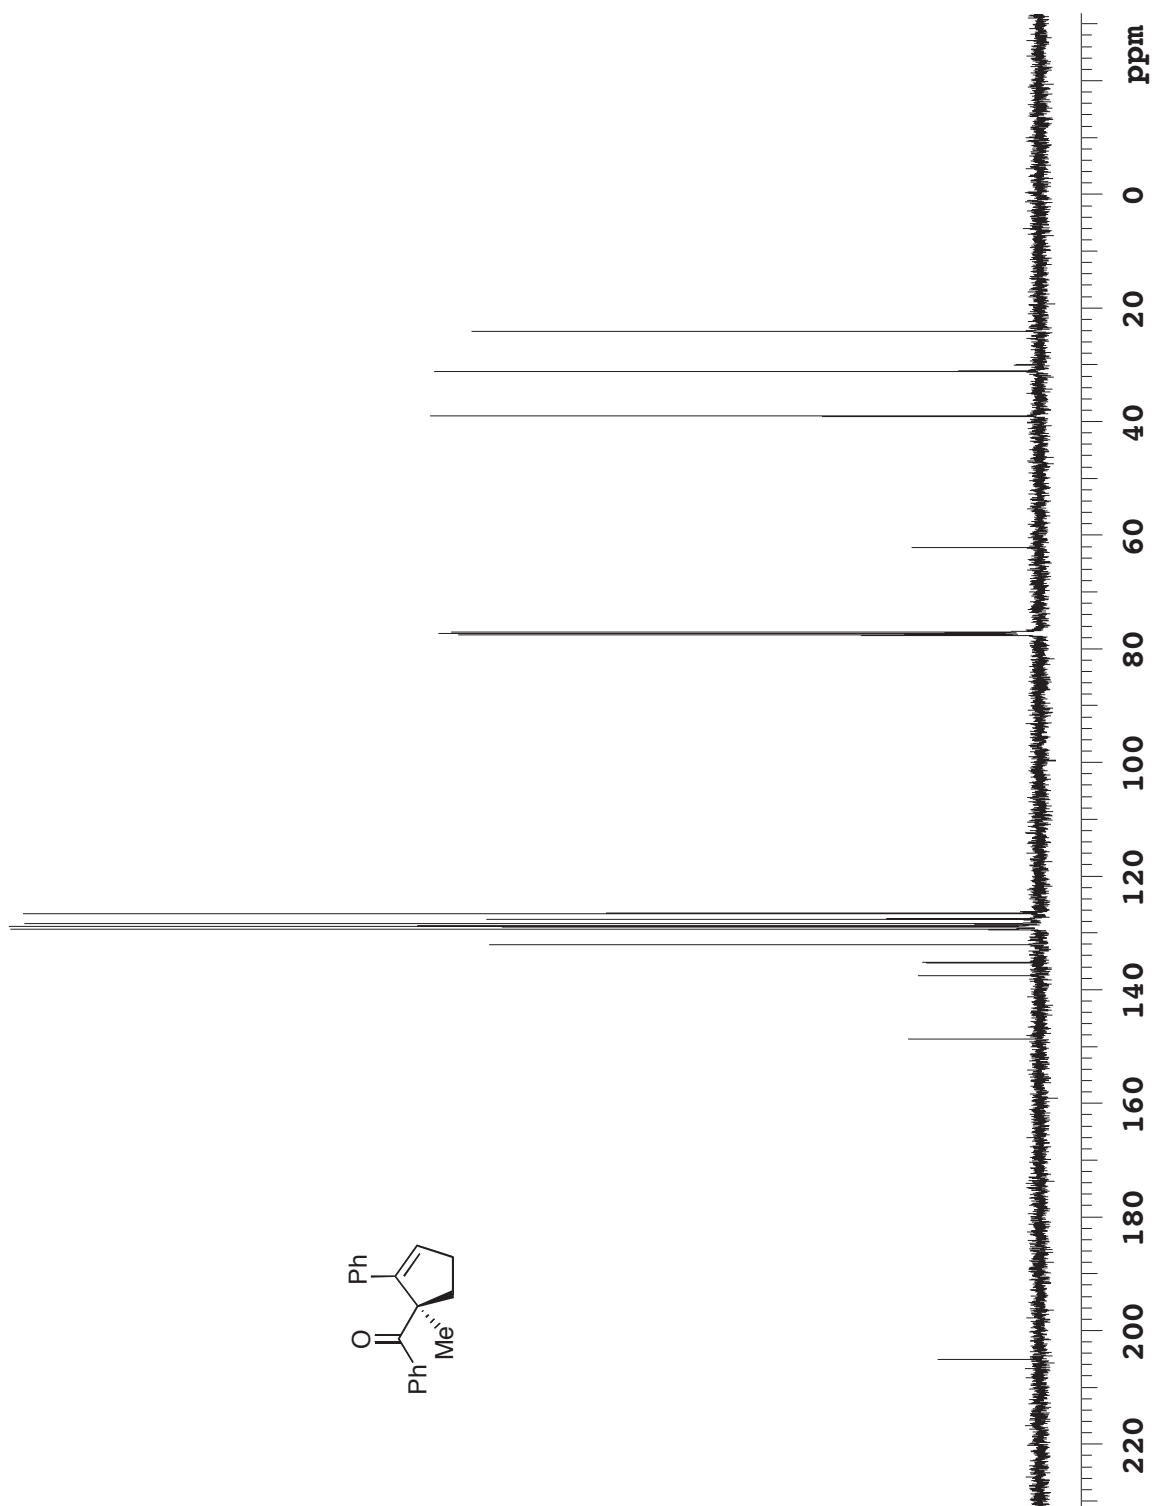

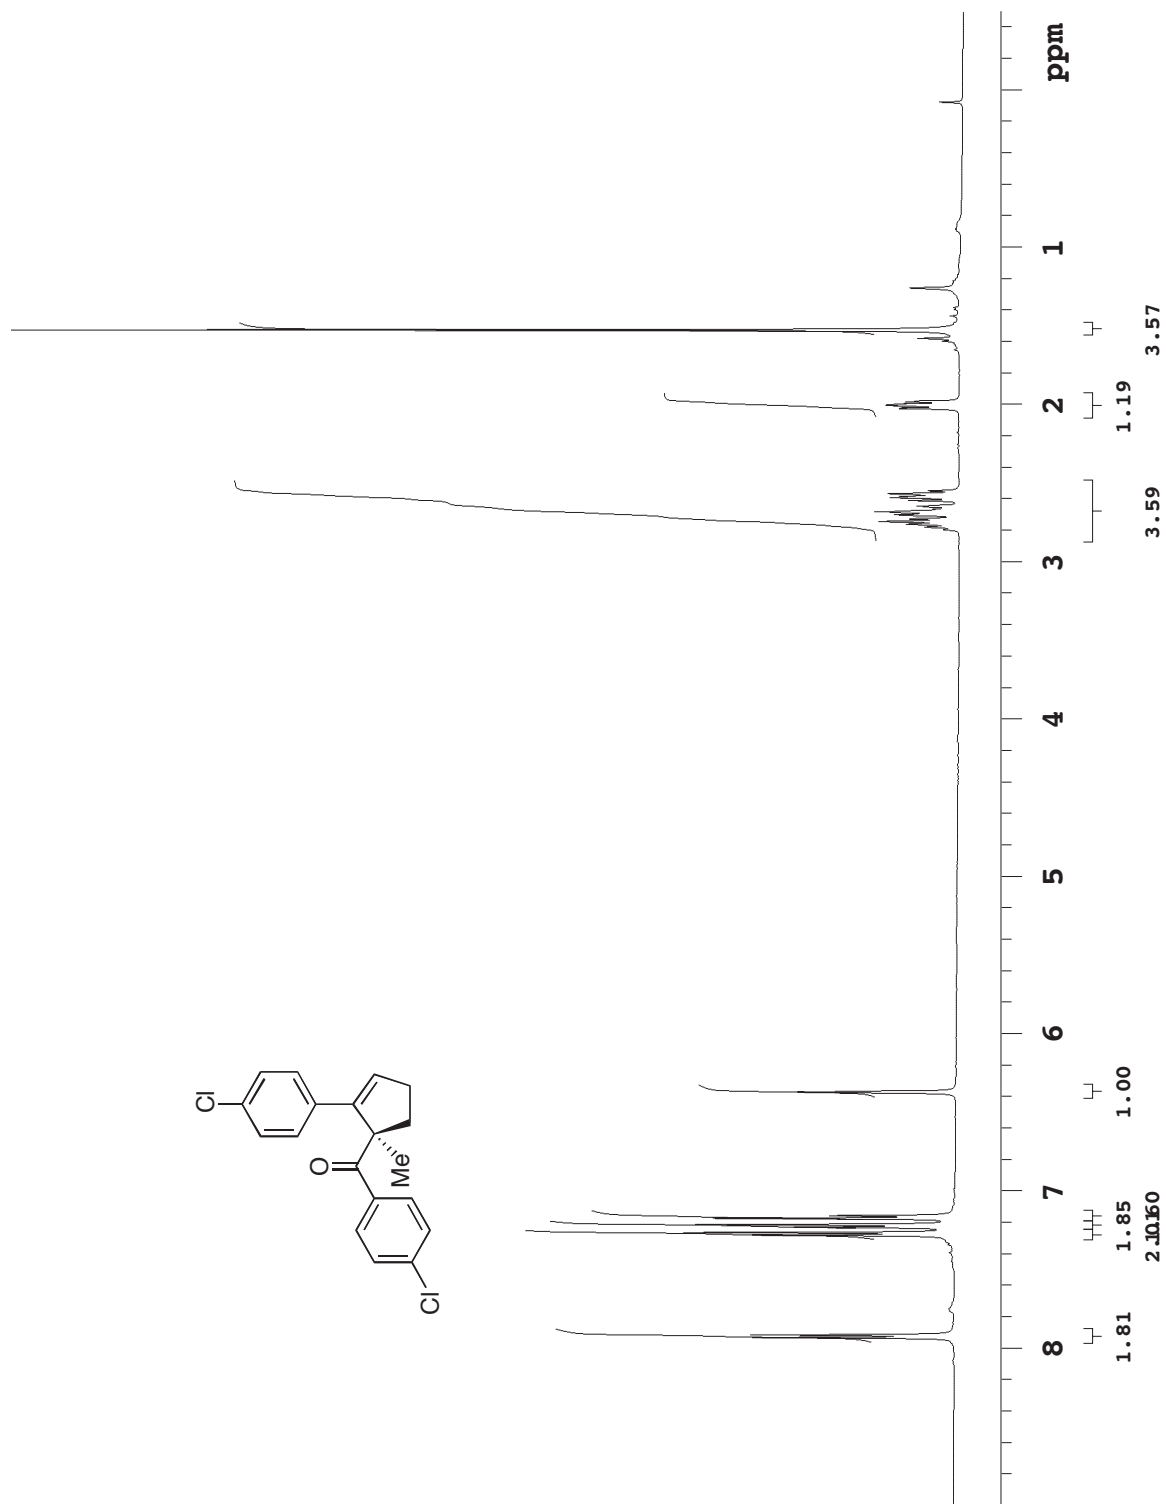

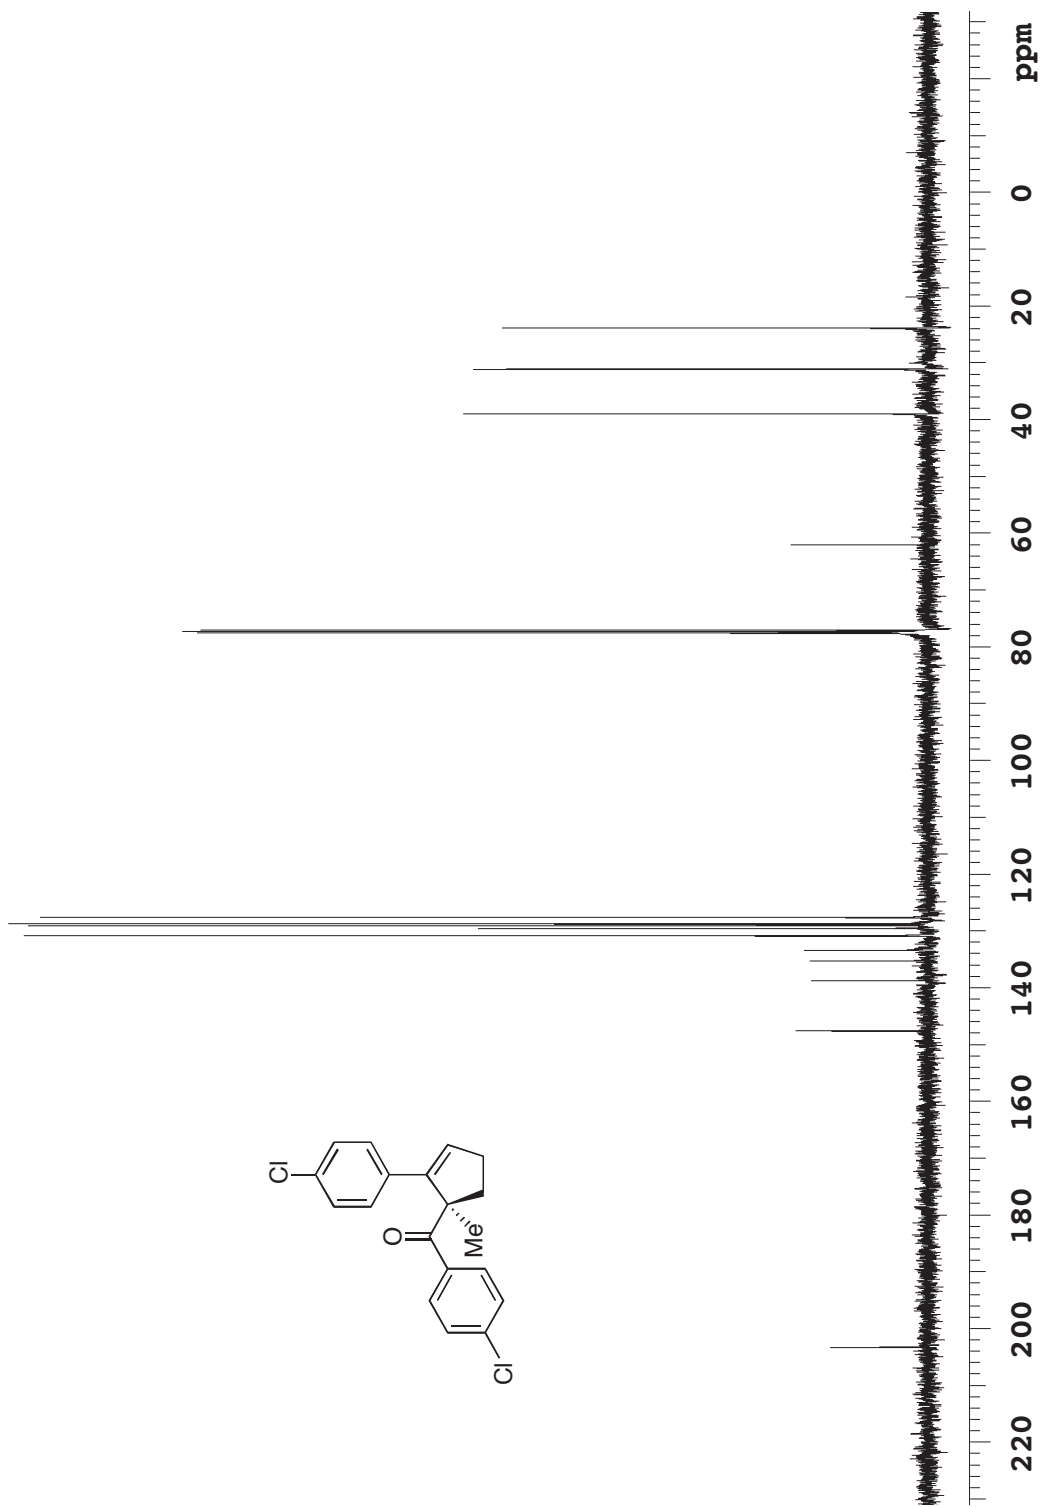

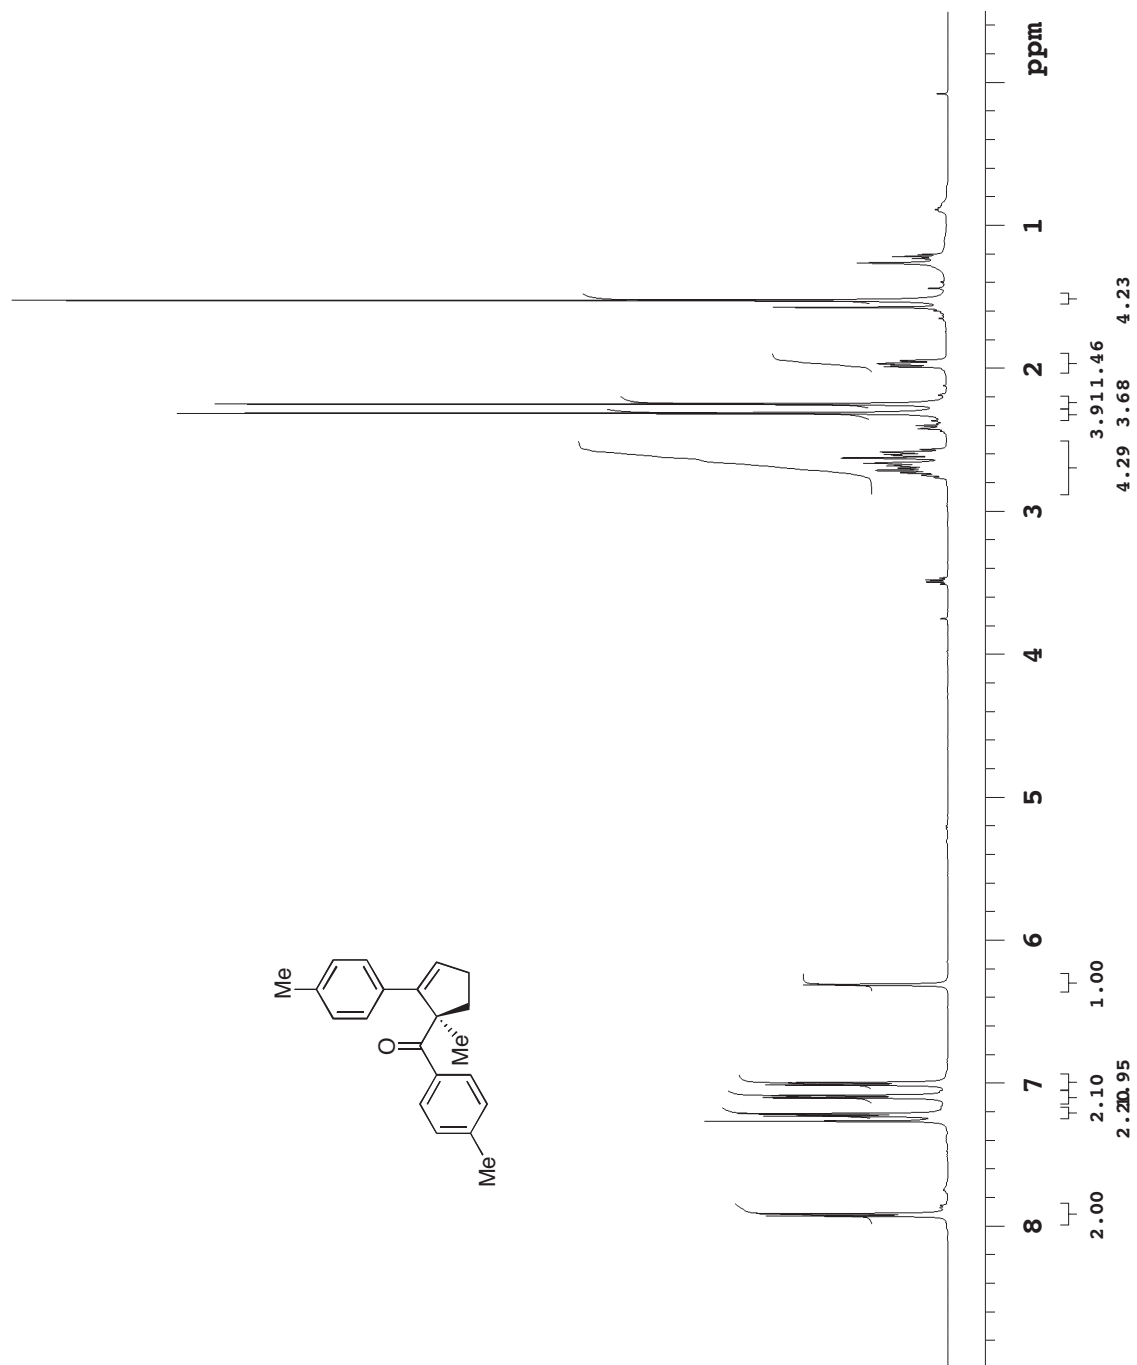

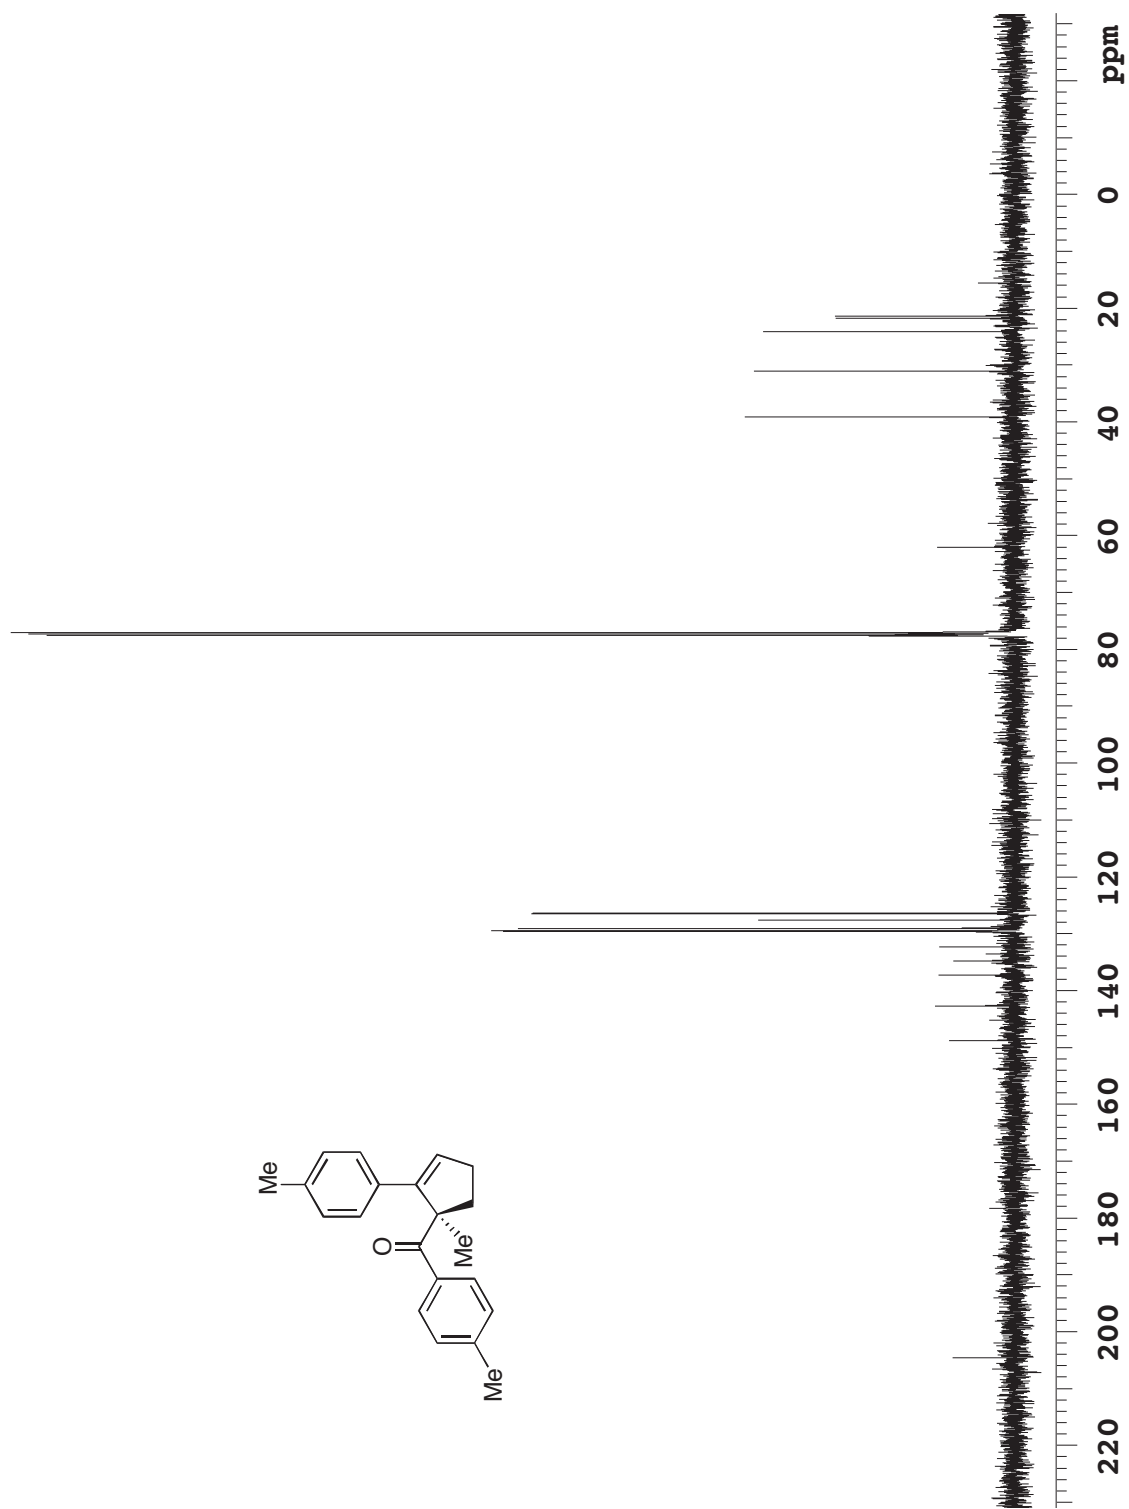

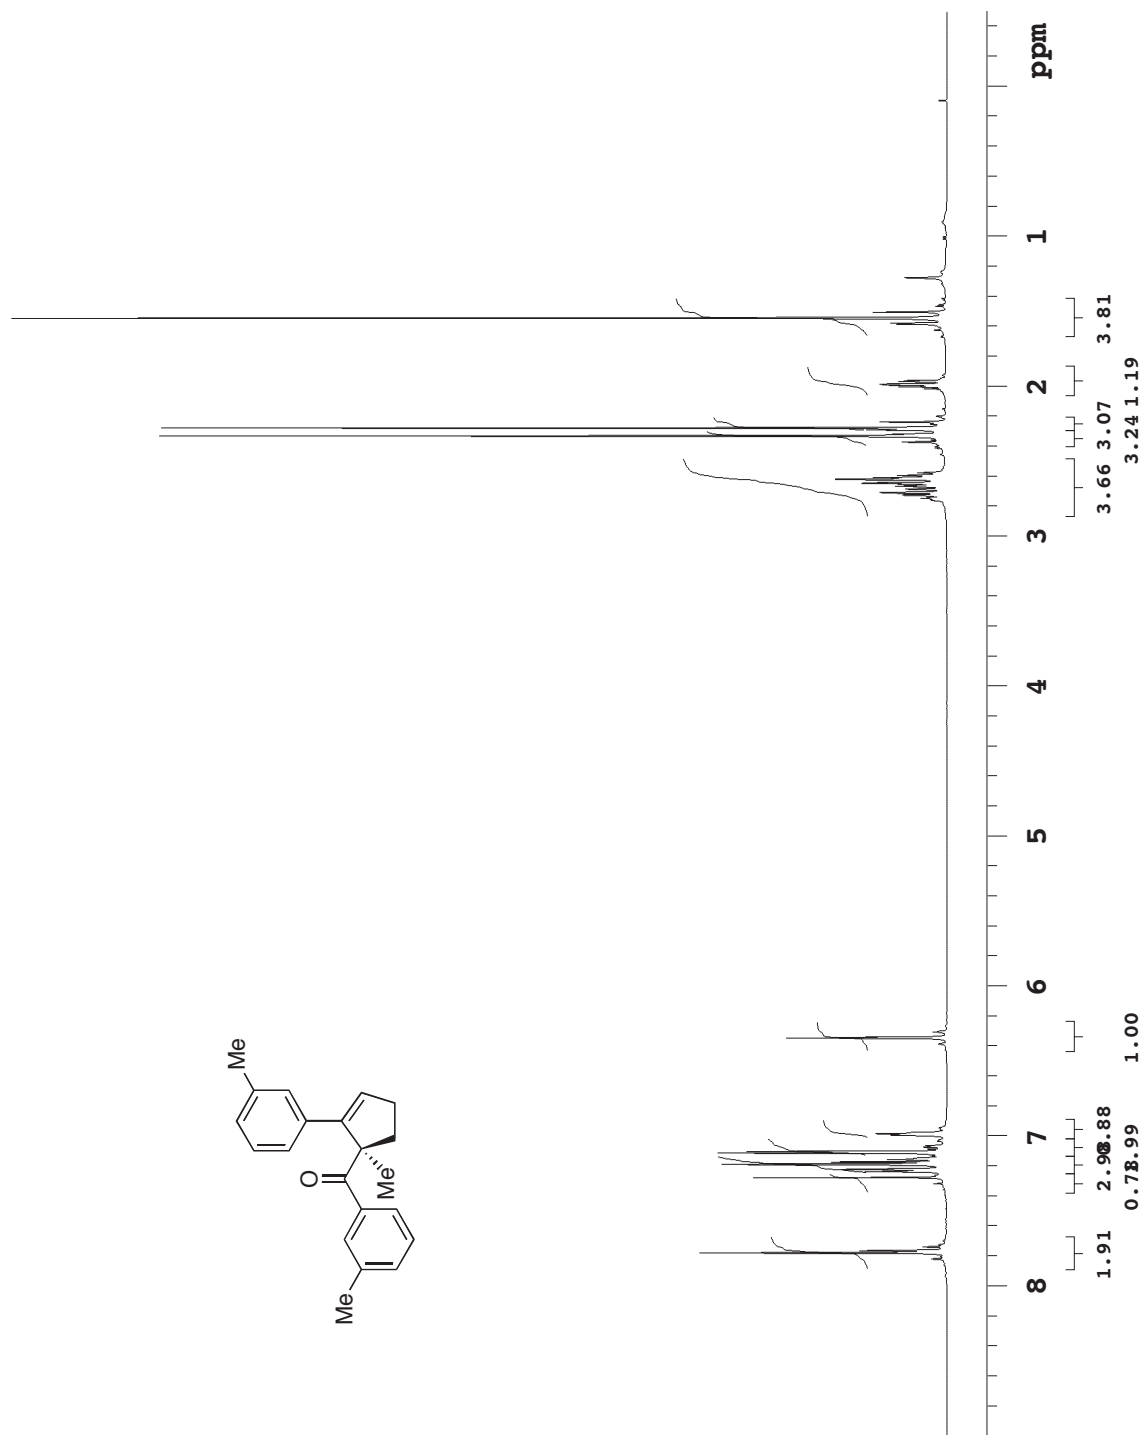

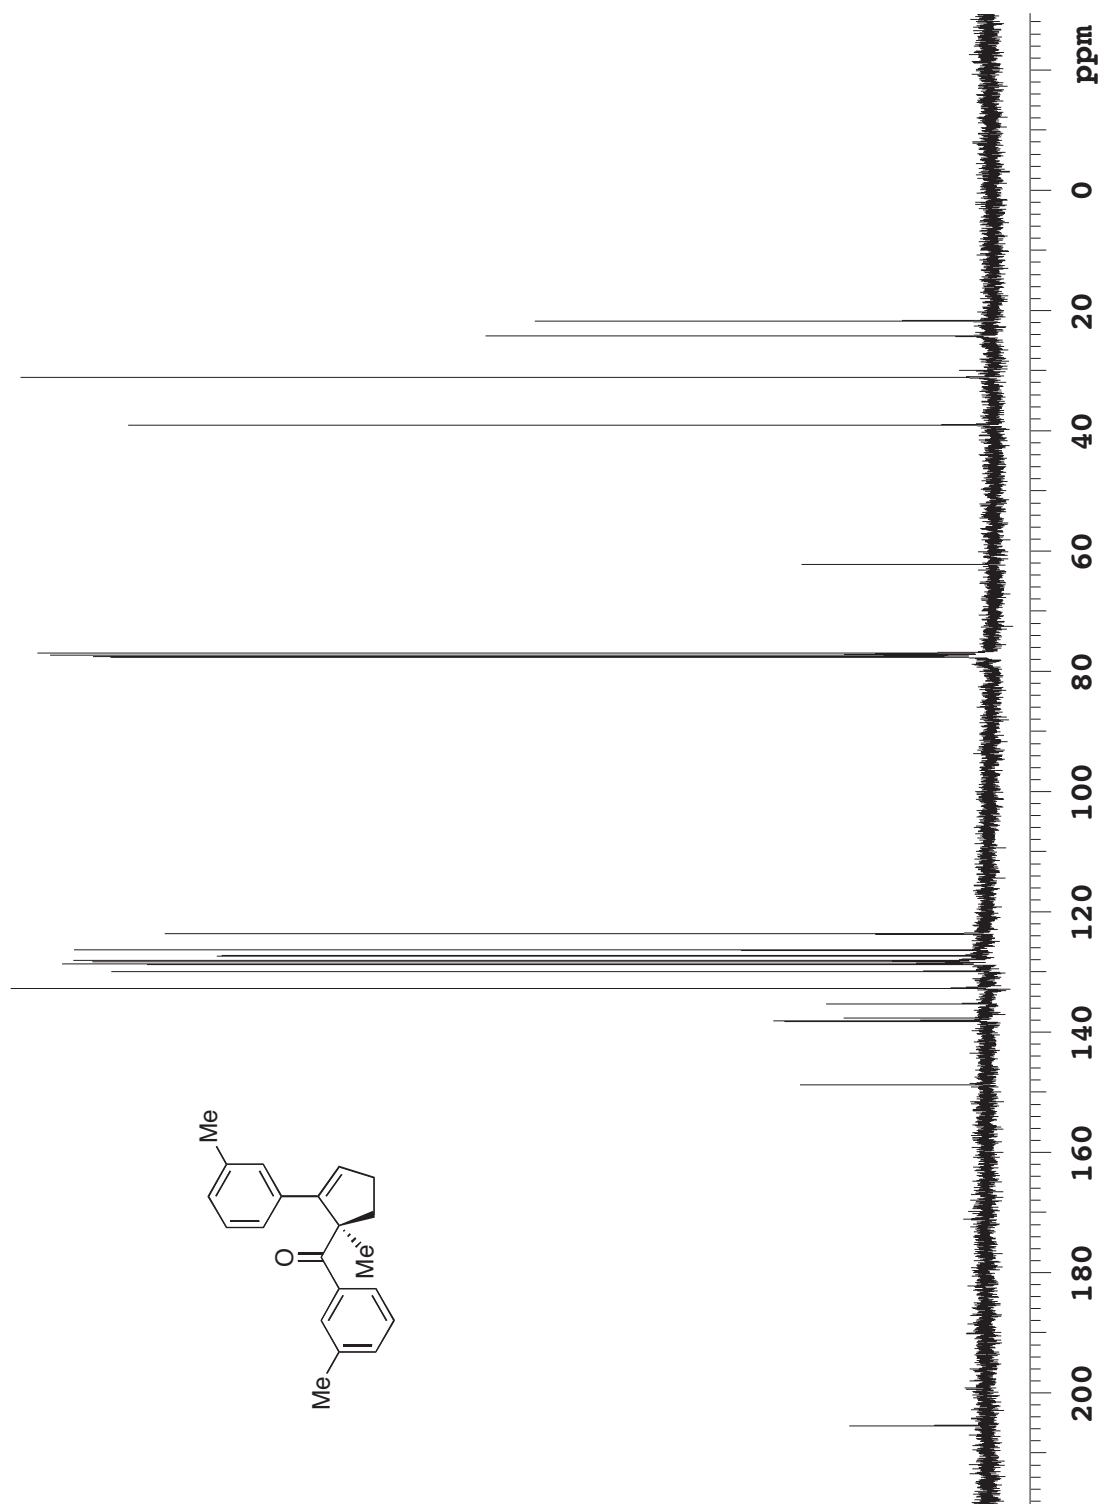



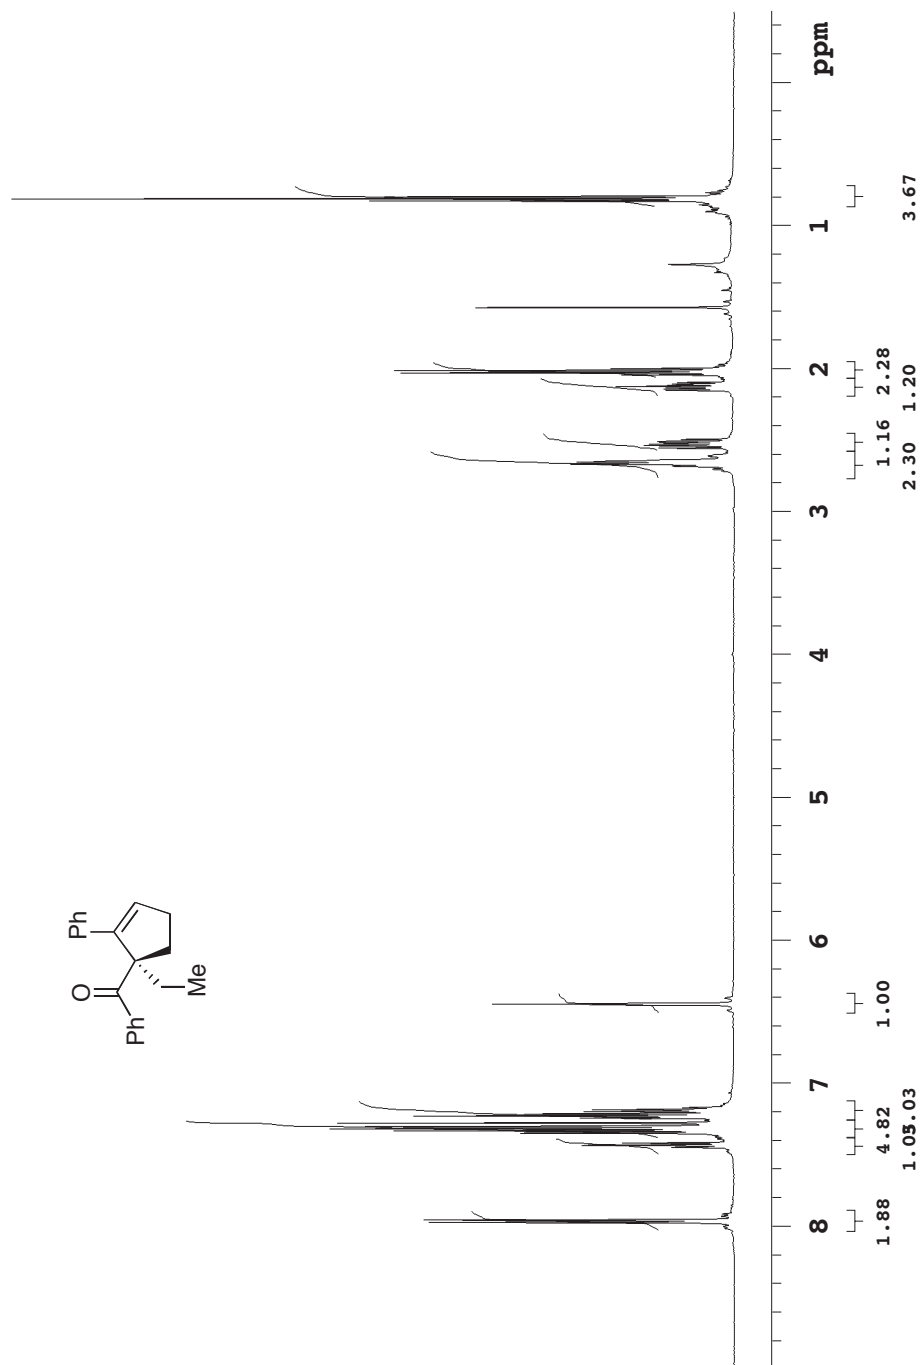

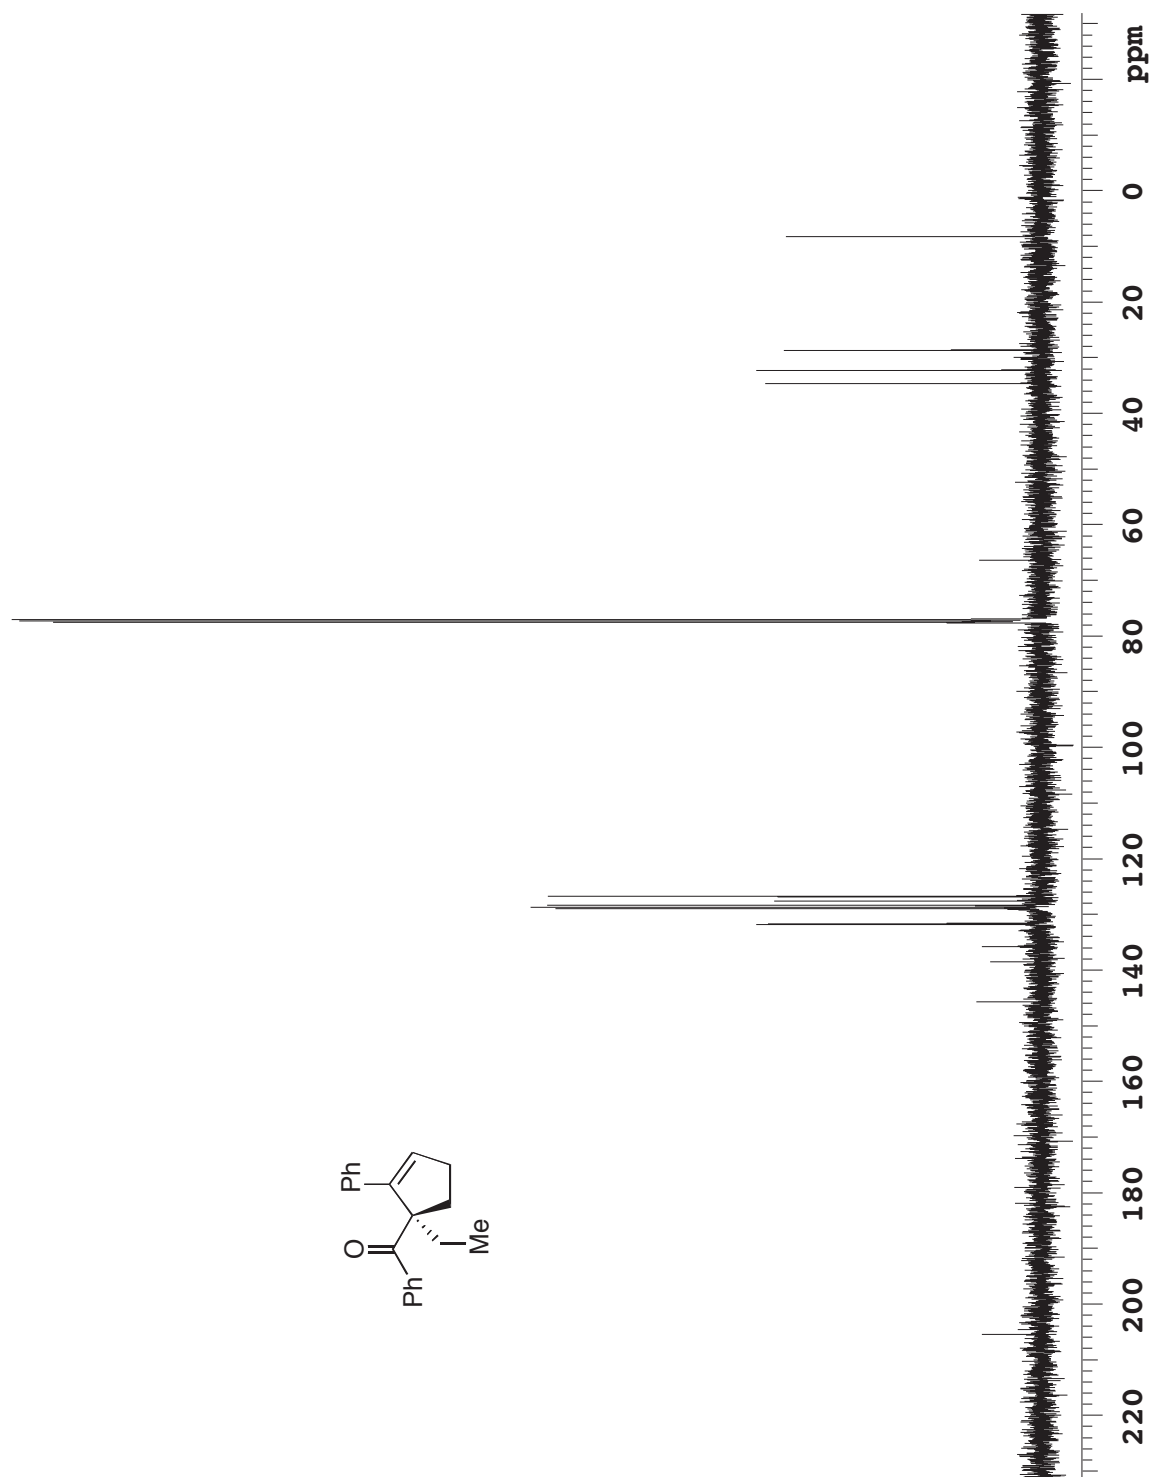

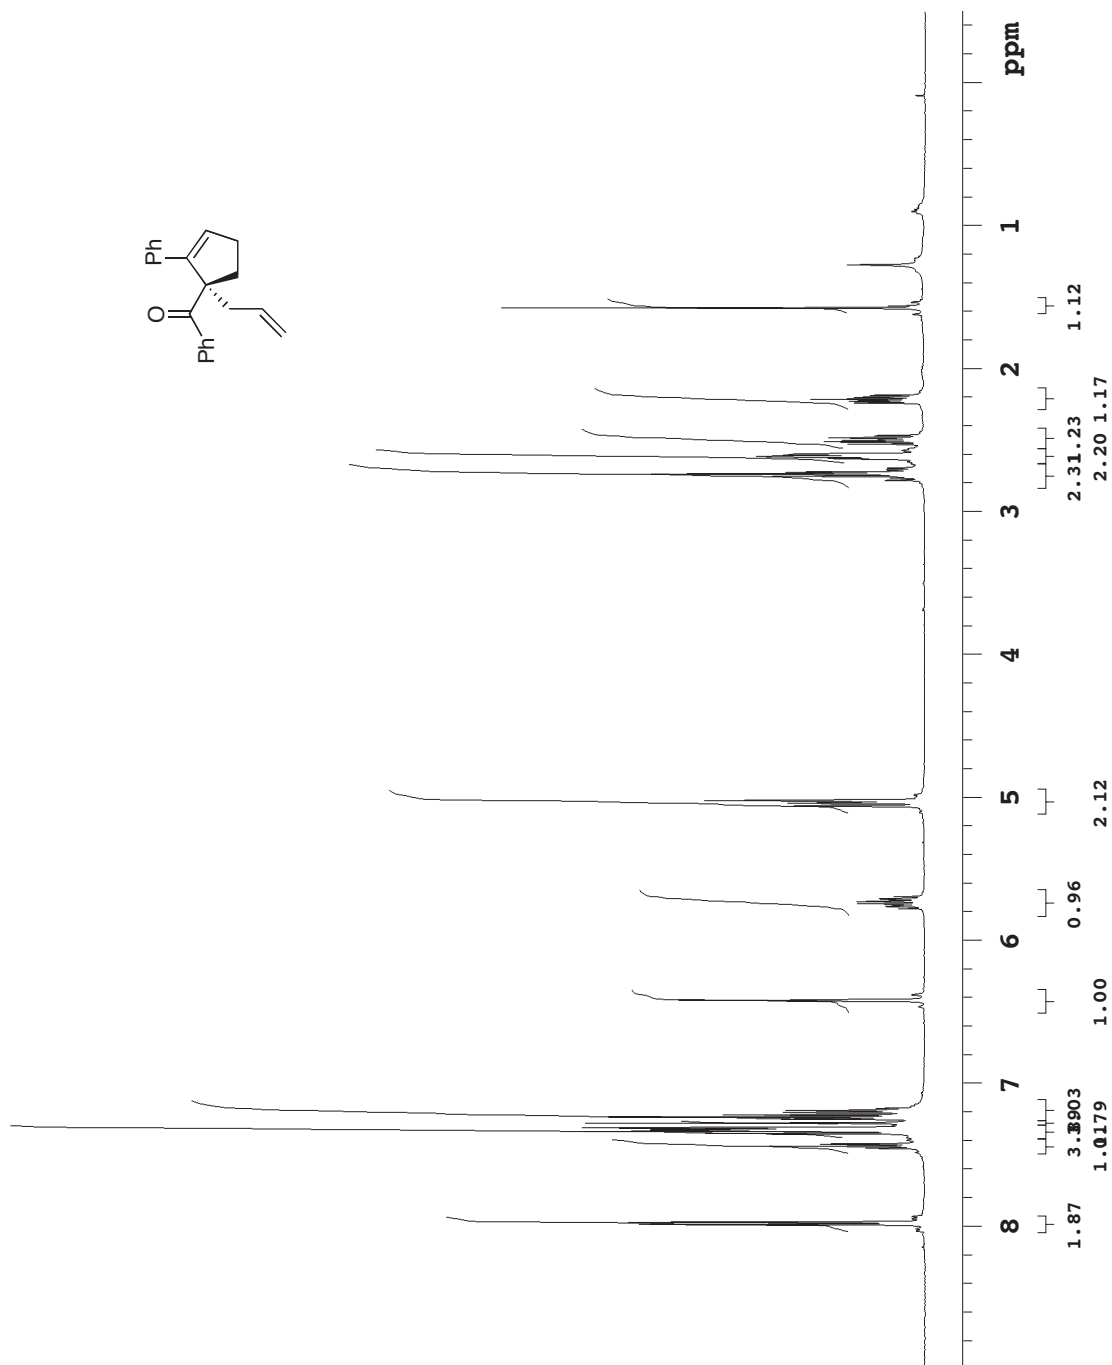

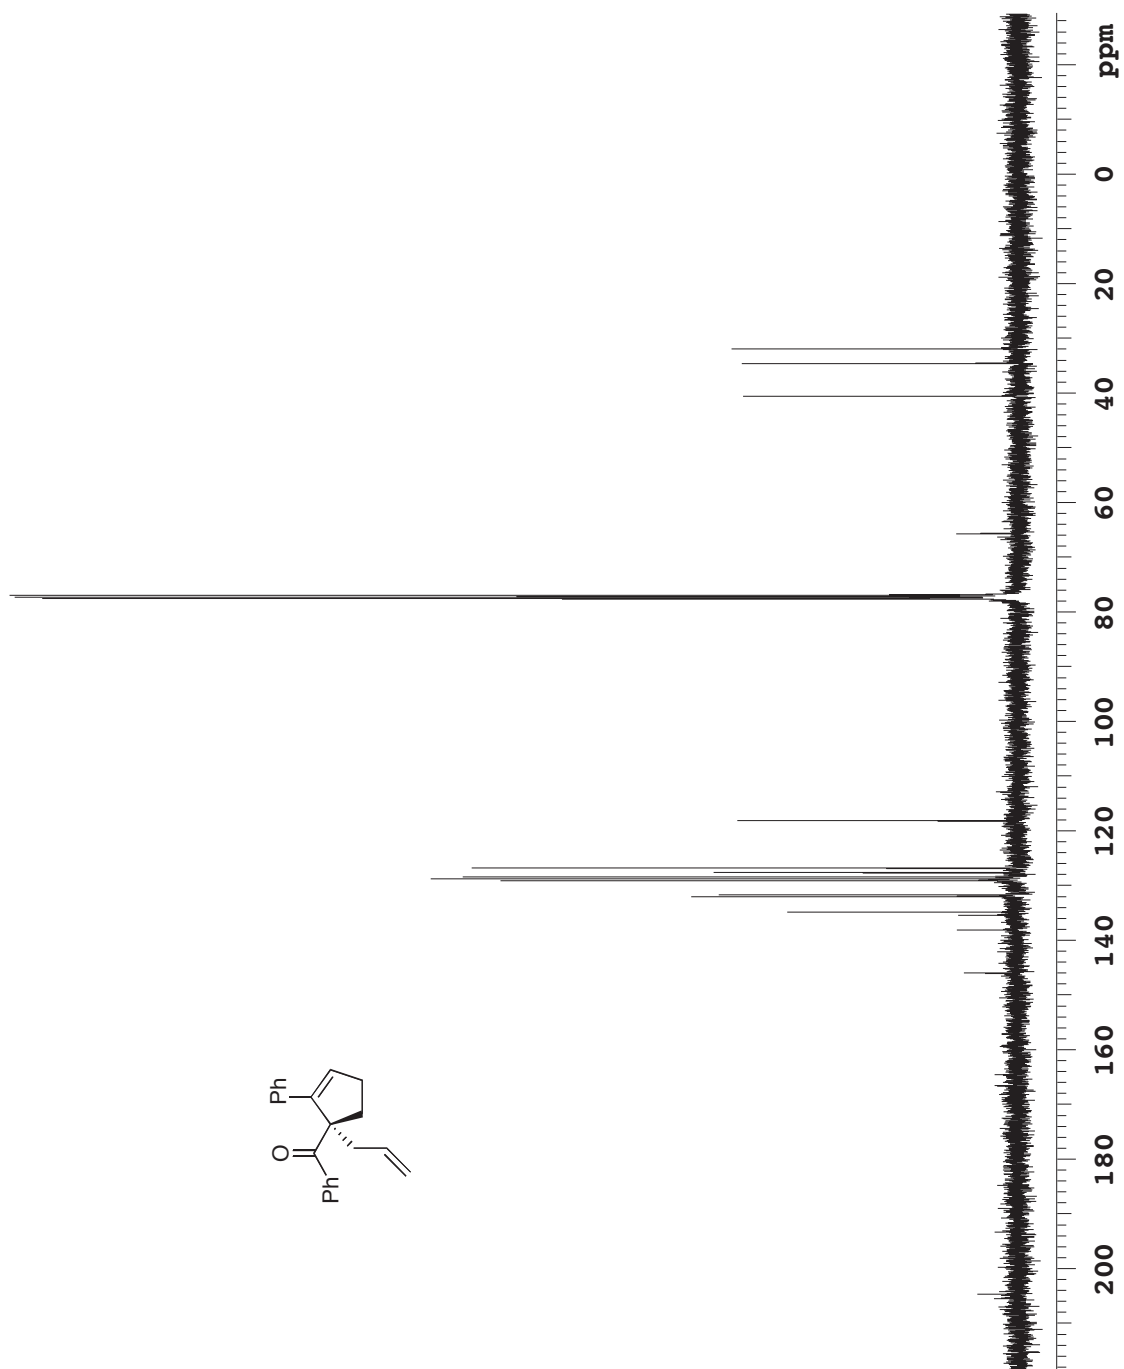

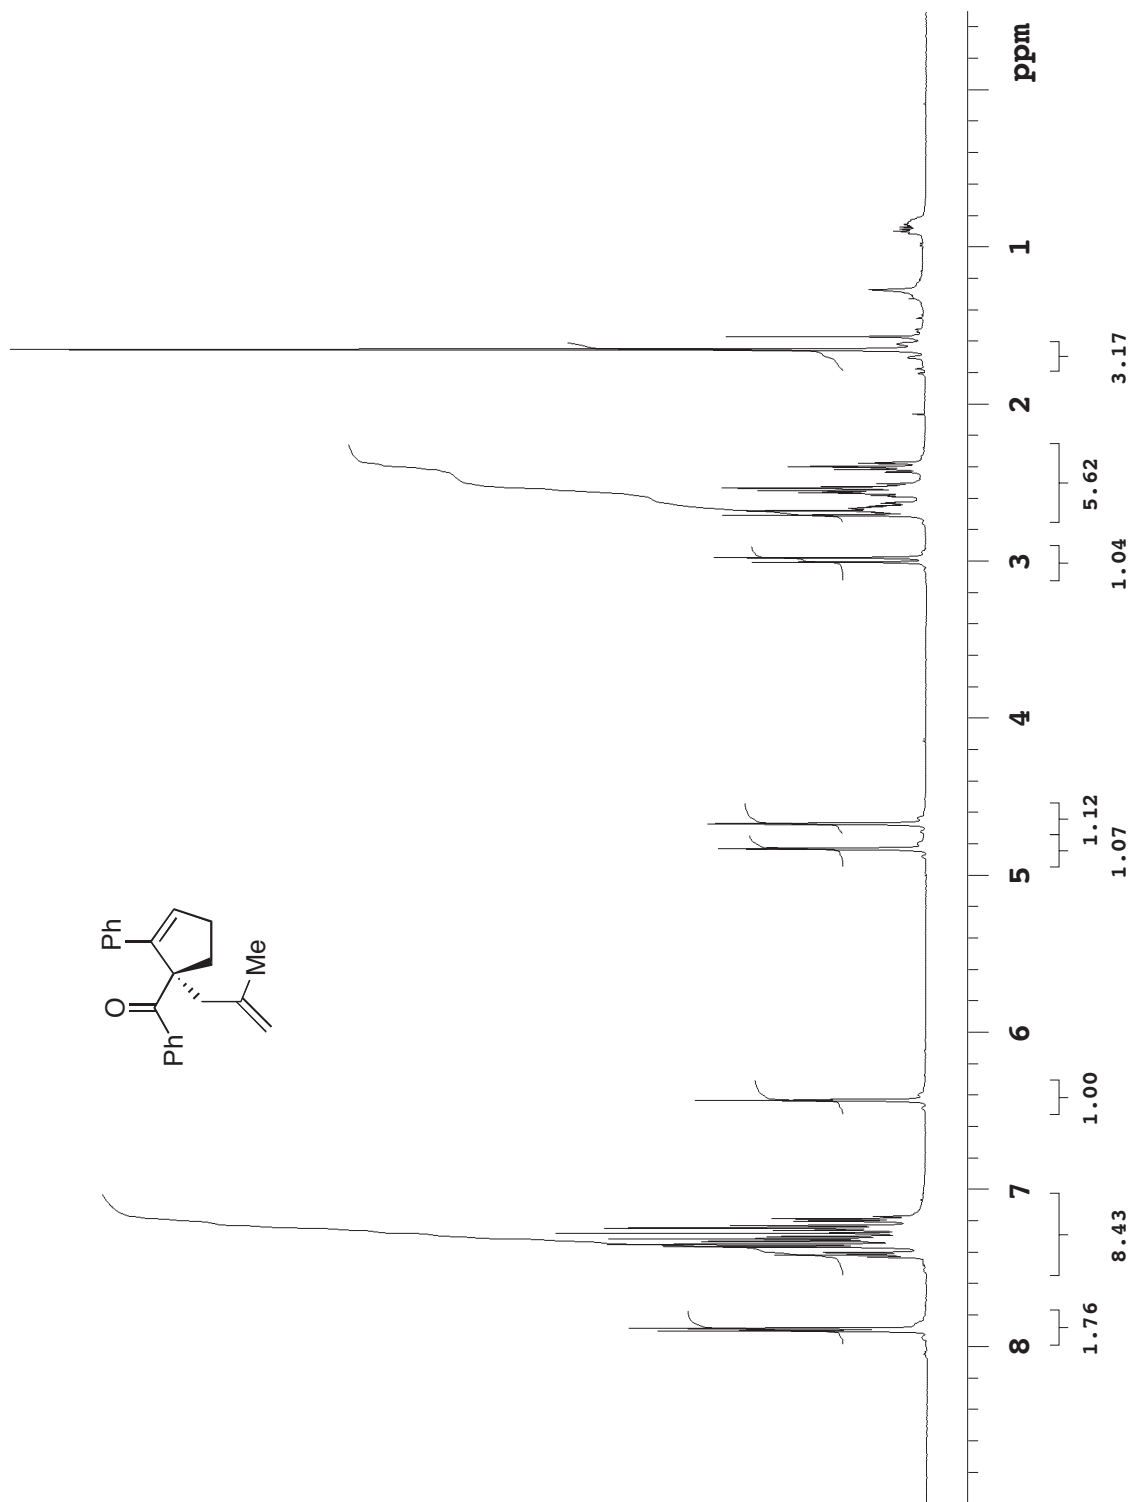

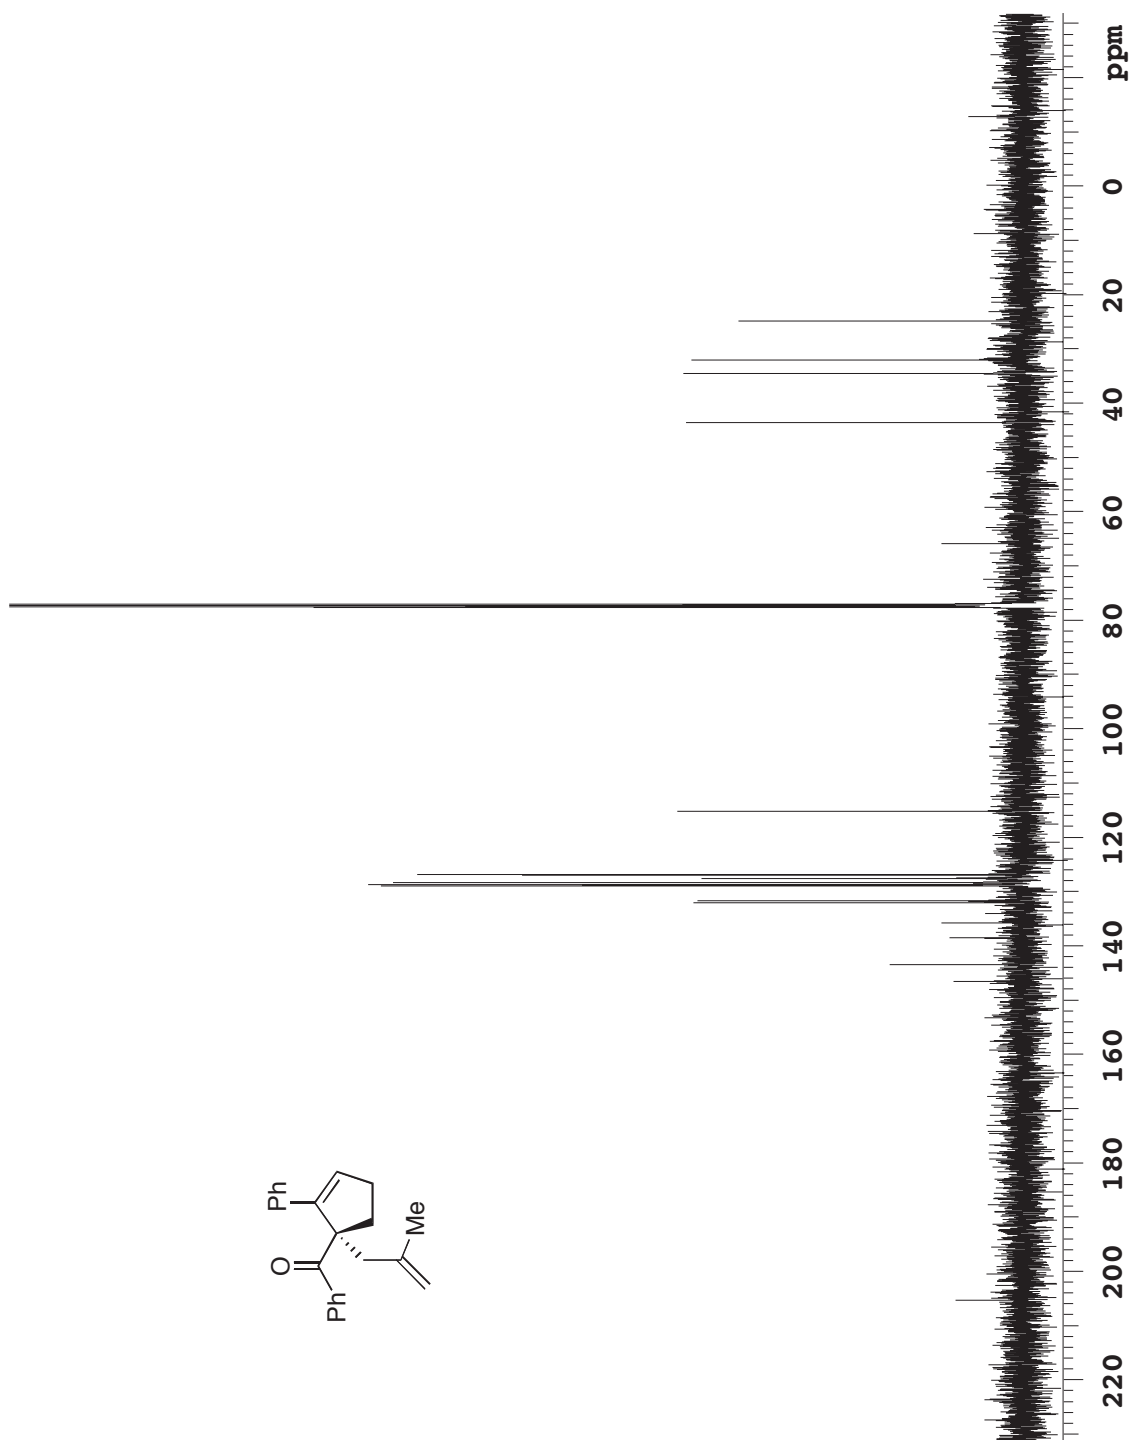

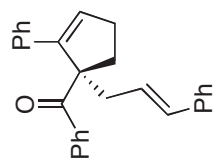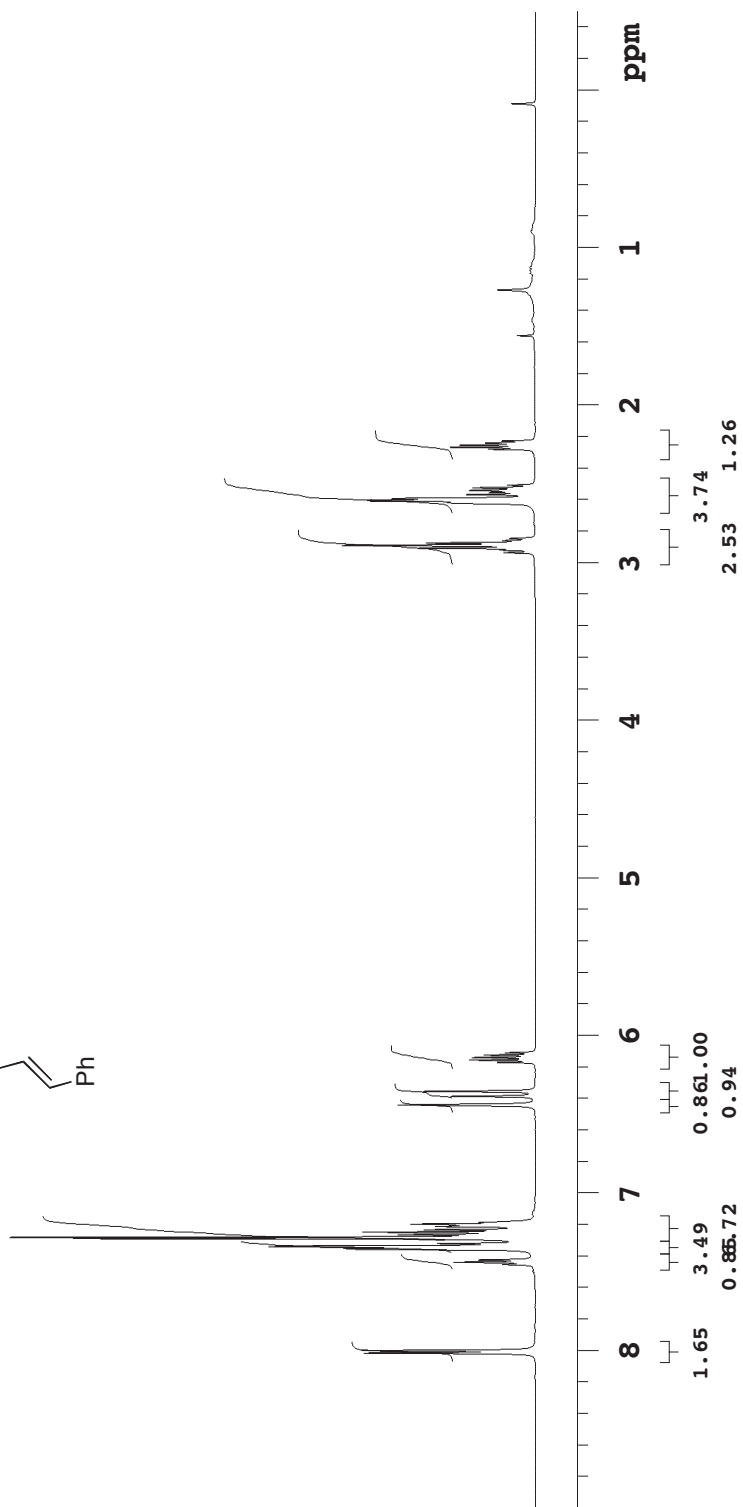

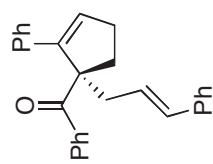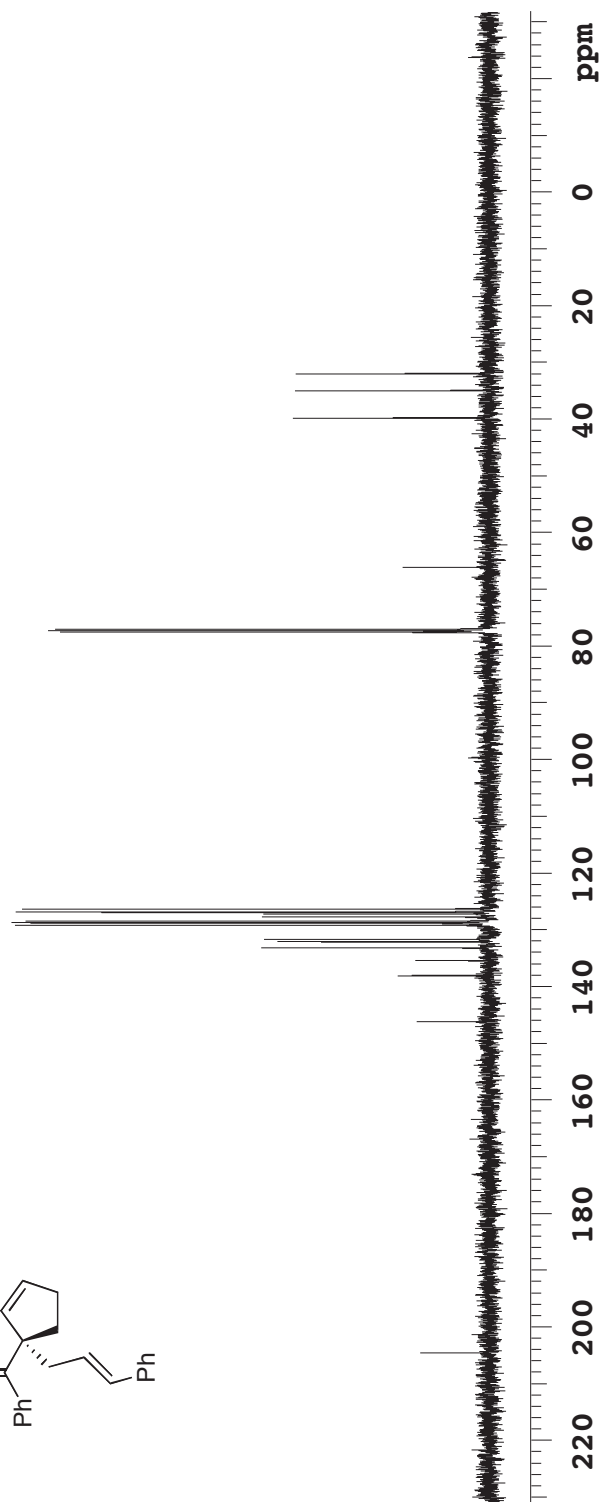



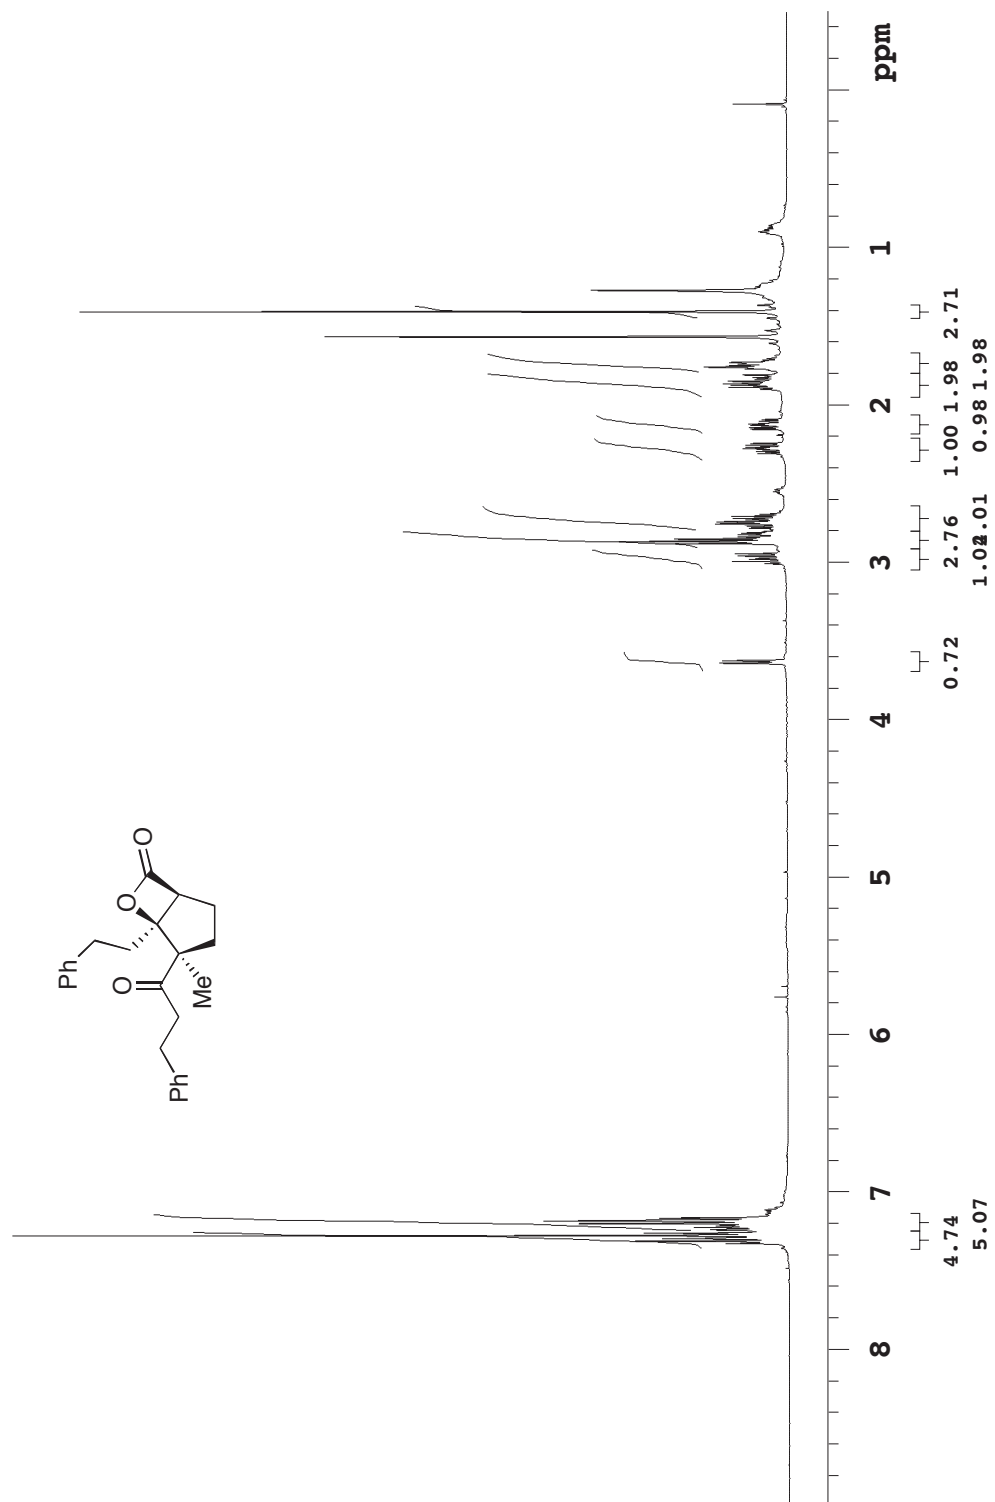

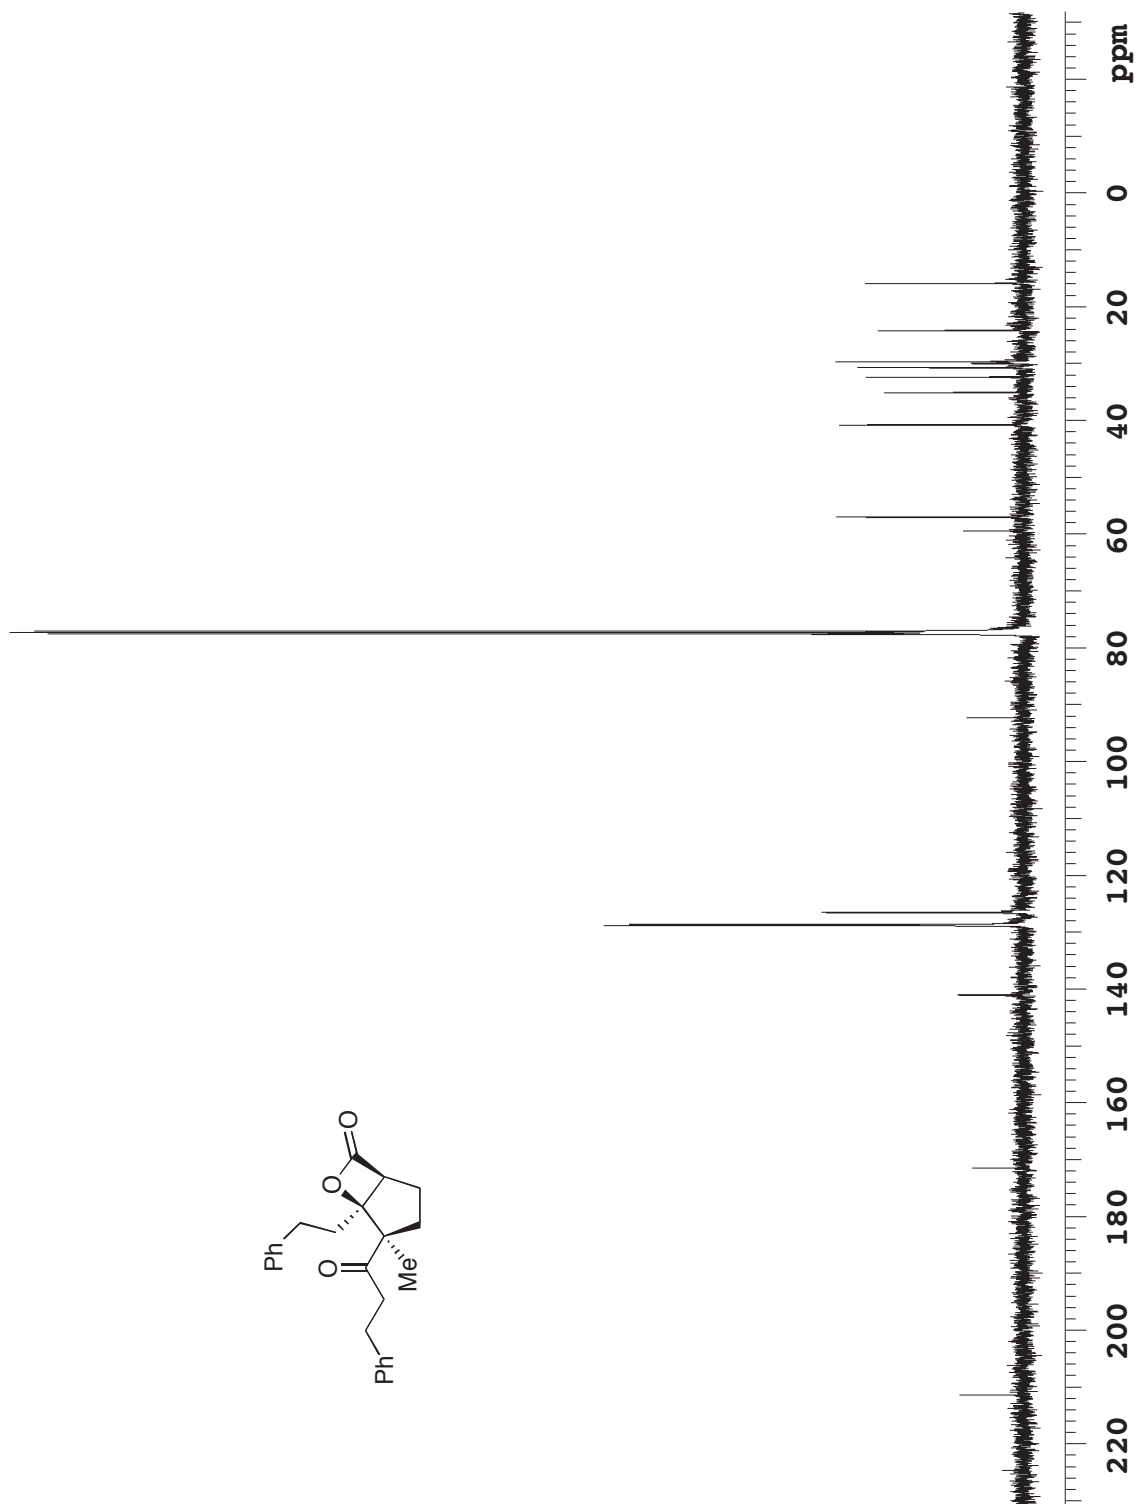

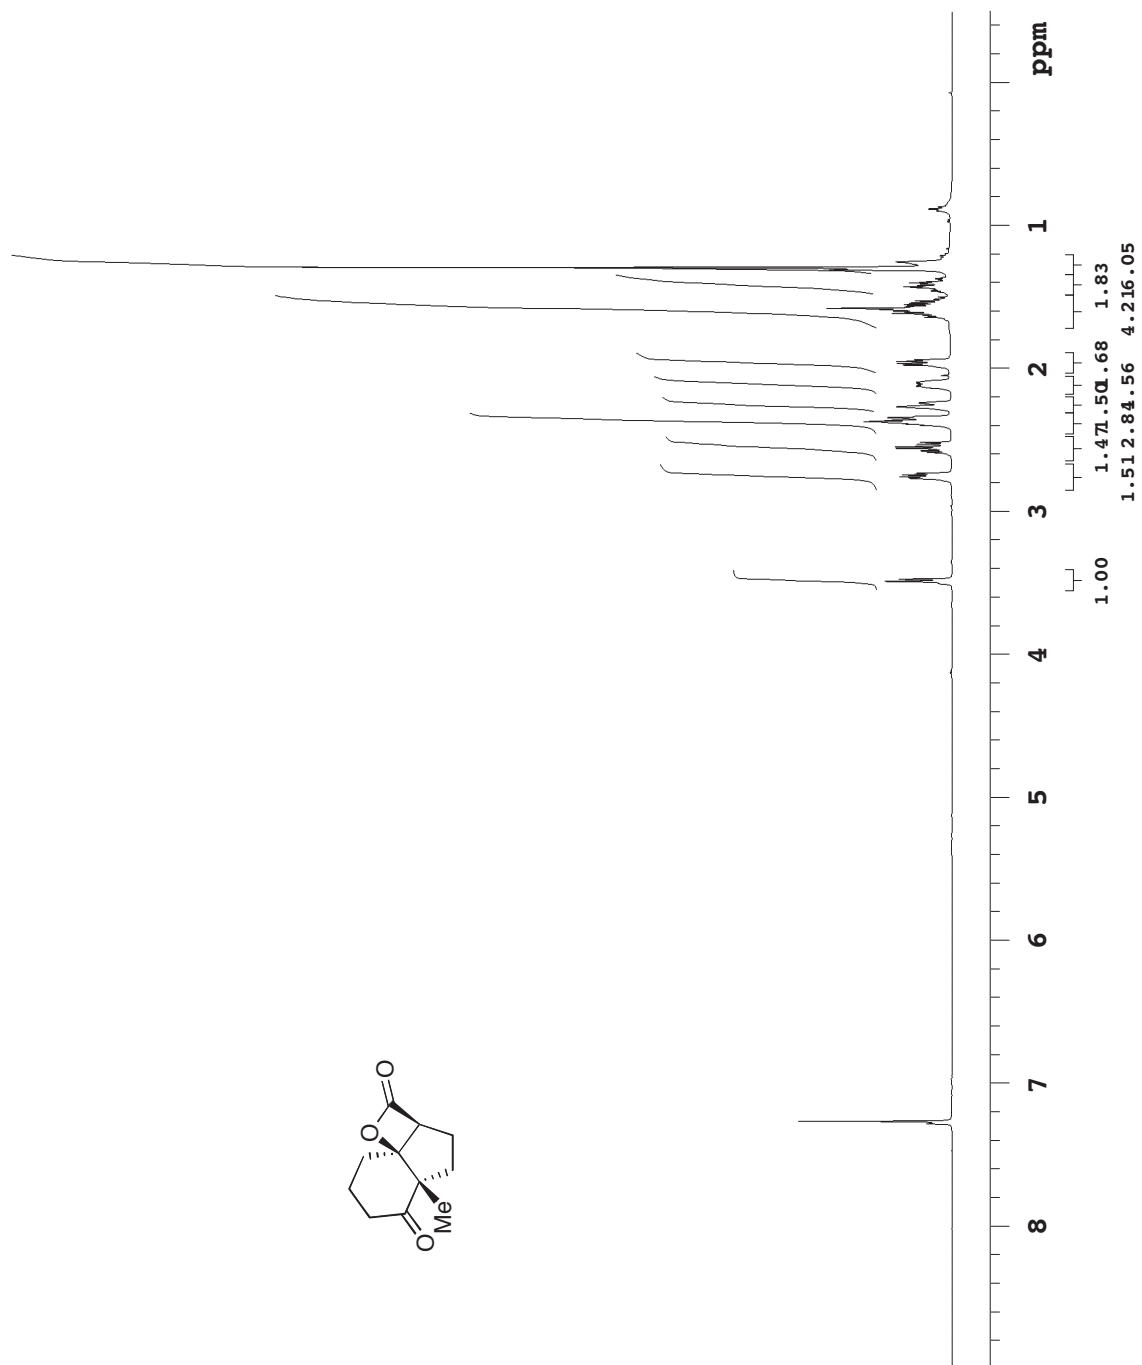

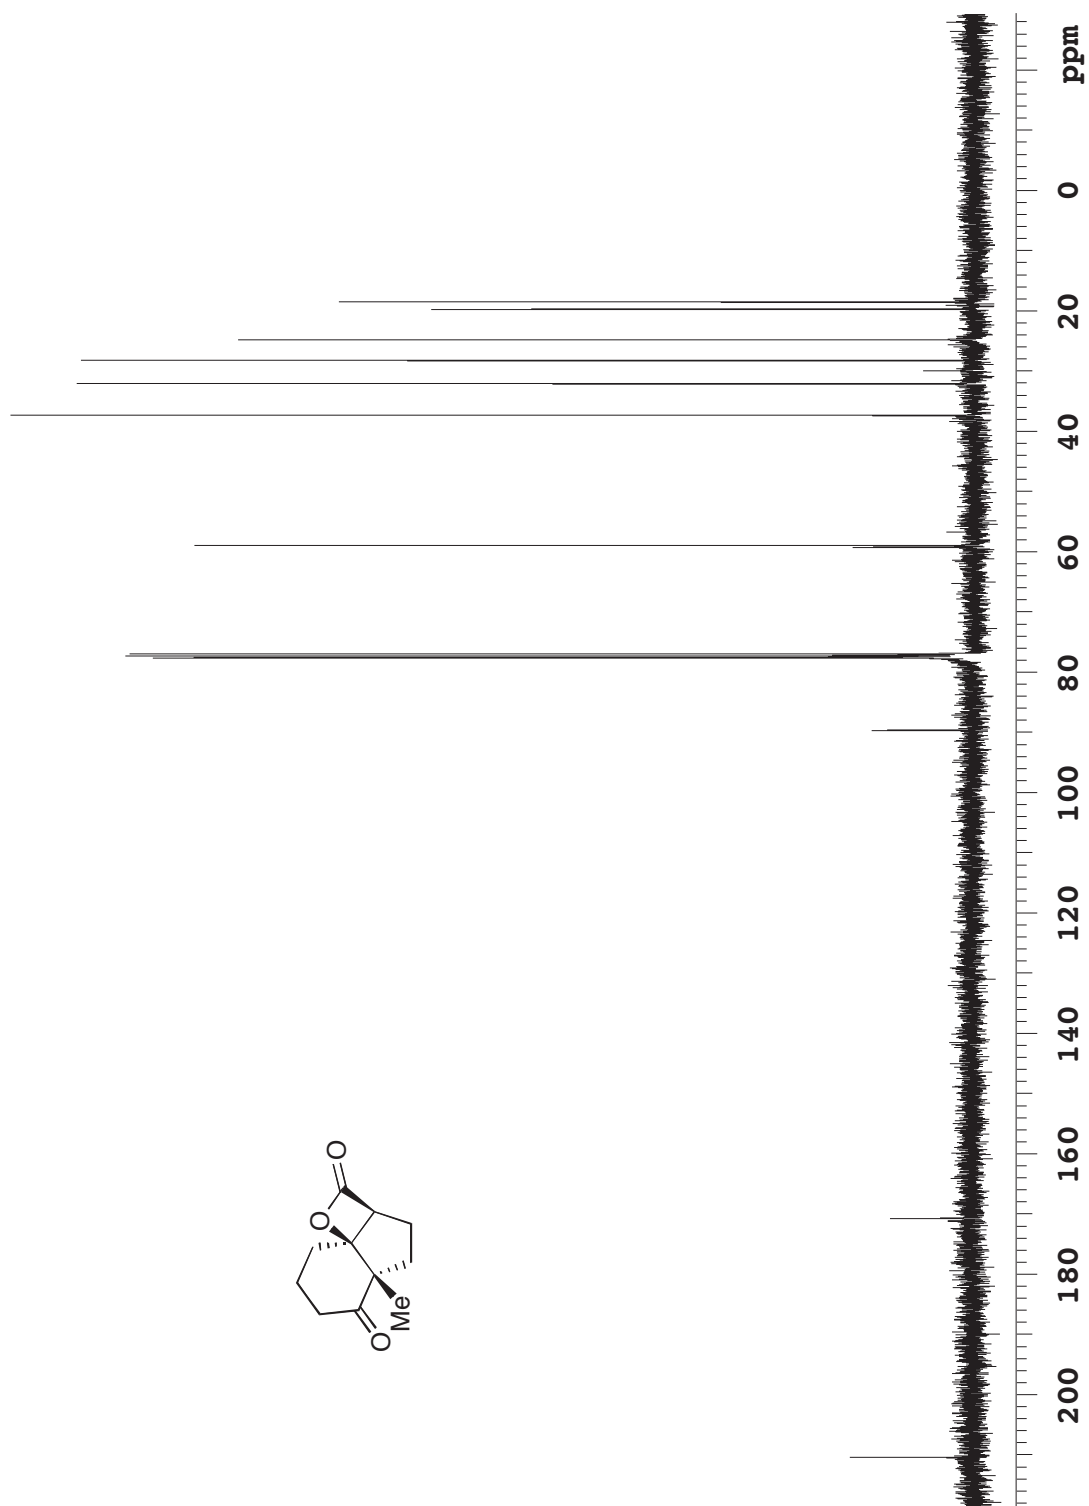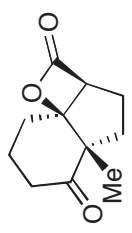

**HPLC and GC Traces**

**Racemic 4**

Data File C:\HPCHEM\2\DATA\MANABU\MWI-2760.D

Sample Name: MWI-276

ee

```

=====
Injection Date : 12/29/2006 12:28:10 PM
Sample Name    : MWI-276                Location : Vial 77
Acq. Operator  : MANABU                Inj Volume : 5 µl
Acq. Method    : C:\HPCHEM\2\METHODS\EPROCKS.M
Last changed   : 12/28/2006 11:29:35 AM by MANABU
                (modified after loading)
Analysis Method : C:\HPCHEM\2\METHODS\MME LC.M
Last changed   : 5/14/2007 9:54:04 PM by Rob
                (modified after loading)
    
```

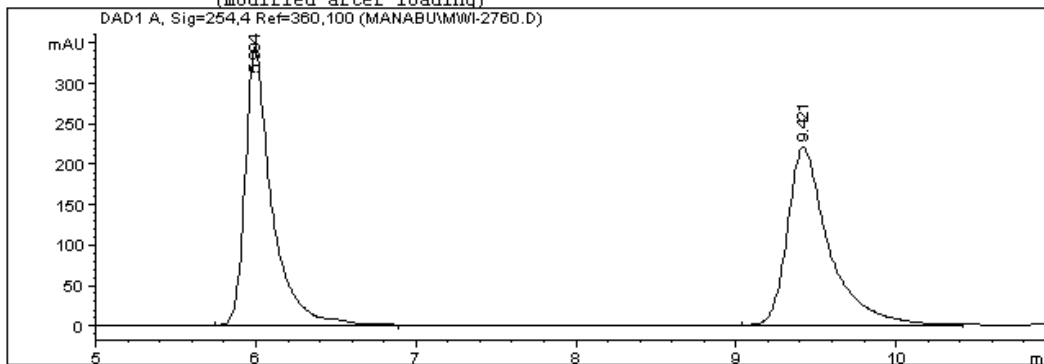

=====  
 Area Percent Report  
 =====

```

Sorted By      :      Signal
Multiplier     :      1.0000
Dilution       :      1.0000
Use Multiplier & Dilution Factor with ISTDs
    
```

Signal 1: DAD1 A, Sig=254,4 Ref=360,100

| Peak # | RetTime [min] | Type | Width [min] | Area [mAU*s] | Height [mAU] | Area %  |
|--------|---------------|------|-------------|--------------|--------------|---------|
| 1      | 5.994         | BB   | 0.1680      | 4000.78589   | 343.31052    | 50.0895 |
| 2      | 9.421         | BB   | 0.2626      | 3986.49365   | 220.86250    | 49.9105 |

Totals :                    7987.27954  564.17302

Results obtained with enhanced integrator!

=====  
 \*\*\* End of Report \*\*\*

**Enantioenriched 4**

Data File C:\HPCHEM\2\DATA\MANABU\FORPAP~1\PH.D

Sample Name: MWII-32

diphenyl

```

=====
Injection Date : 1/26/2007 7:37:18 PM
Sample Name    : MWII-32                Location : Vial 72
Acq. Operator  : MANABU
                                           Inj Volume : 1 µl
Acq. Method    : C:\HPCHEM\2\METHODS\EPROCKS.M
Last changed   : 1/26/2007 7:36:16 PM by MANABU
                 (modified after loading)
Analysis Method : C:\HPCHEM\2\METHODS\MANABU.M
Last changed   : 6/1/2007 1:28:22 PM by MANABU
                 (modified after loading)
    
```

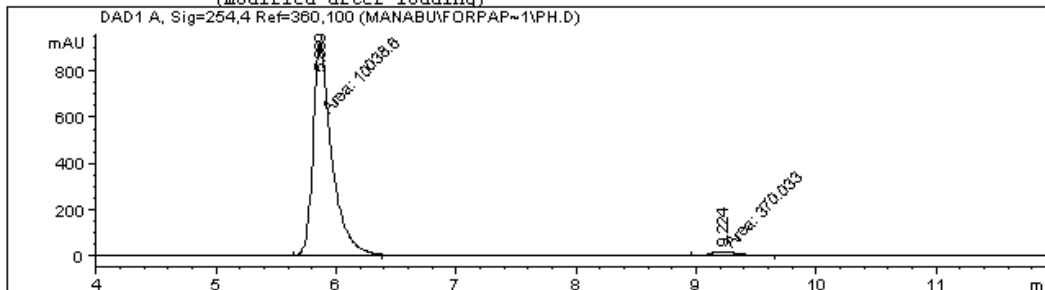

Area Percent Report

```

Sorted By      :      Signal
Multiplier     :      1.0000
Dilution       :      1.0000
Use Multiplier & Dilution Factor with ISTDs
    
```

Signal 1: DAD1 A, Sig=254,4 Ref=360,100

| Peak # | RetTime [min] | Type | Width [min] | Area [mAU*s] | Height [mAU] | Area %  |
|--------|---------------|------|-------------|--------------|--------------|---------|
| 1      | 5.869         | MM   | 0.1813      | 1.00386e4    | 922.93201    | 96.4449 |
| 2      | 9.224         | MM   | 0.3216      | 370.03271    | 19.17678     | 3.5551  |

Totals : 1.04086e4 942.10879

Results obtained with enhanced integrator!

\*\*\* End of Report \*\*\*

**Racemic 5**

Data File C:\HPCHEM\2\DATA\MANABU\MWII-CL.D

Sample Name: MWII-Cl

```

=====
Injection Date   : 5/30/2007 3:25:00 AM
Sample Name     : MWII-Cl                      Location : Vial 2
Acq. Operator   : MANABU                      Inj Volume : 2 µl
Method          : C:\HPCHEM\2\METHODS\MANABU.M
Last changed    : 5/30/2007 3:38:21 AM by MANABU
                  (modified after loading)
    
```

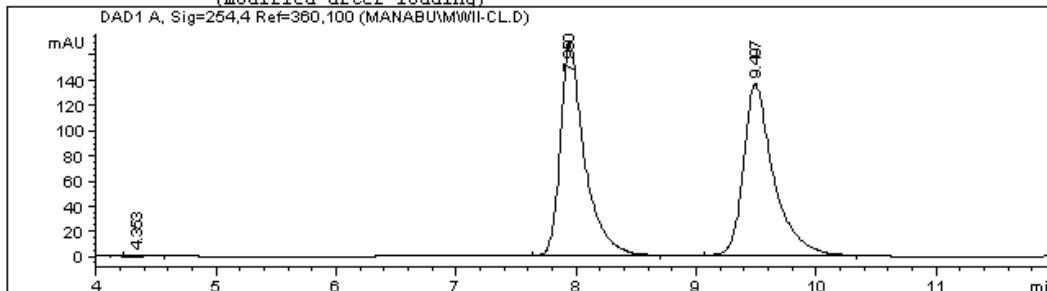

Area Percent Report

```

=====
Sorted By      :      Signal
Multiplier     :      1.0000
Dilution       :      1.0000
Use Multiplier & Dilution Factor with ISTDs
    
```

Signal 1: DAD1 A, Sig=254,4 Ref=360,100

| Peak # | RetTime [min] | Type | Width [min] | Area [mAU*s] | Height [mAU] | Area %  |
|--------|---------------|------|-------------|--------------|--------------|---------|
| 1      | 4.353         | PB   | 0.1272      | 9.79792      | 1.08663      | 0.2041  |
| 2      | 7.950         | BB   | 0.2051      | 2387.78174   | 168.73271    | 49.7389 |
| 3      | 9.497         | BB   | 0.2548      | 2403.04907   | 136.91711    | 50.0570 |

Totals :                    4800.62873   306.73646

Results obtained with enhanced integrator!

\*\*\* End of Report \*\*\*

**Enantioenriched 5**

Data File C:\HPCHEM\2\DATA\MANABU\CL-N0006.D

Sample Name: CL-nl

```

=====
Injection Date   : 6/1/2007 11:46:05 AM
Sample Name     : CL-nl                      Location : Vial 3
Acq. Operator   : MANABU                    Inj Volume : 2 µl
Acq. Method     : C:\HPCHEM\2\METHODS\MANABU.M
Last changed    : 6/1/2007 10:49:08 AM by MANABU
                 (modified after loading)
Analysis Method : C:\HPCHEM\2\METHODS\MANABU.M
Last changed    : 6/1/2007 1:26:53 PM by MANABU
                 (modified after loading)
    
```

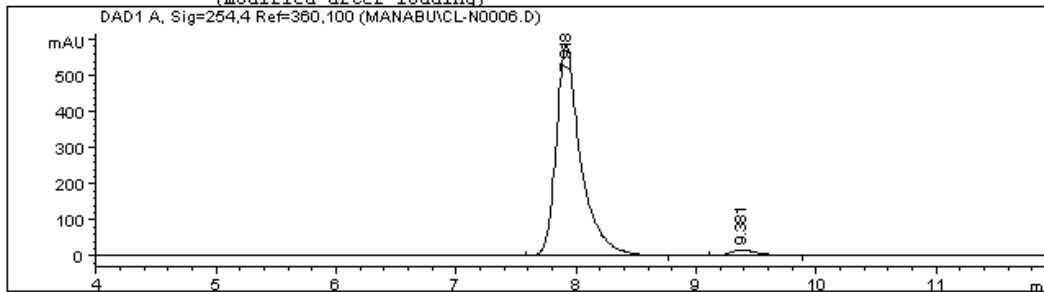

Area Percent Report

```

=====
Sorted By       : Signal
Multiplier     : 1.0000
Dilution       : 1.0000
Use Multiplier & Dilution Factor with ISTDs
    
```

Signal 1: DAD1 A, Sig=254,4 Ref=360,100

| Peak # | RetTime [min] | Type | Width [min] | Area [mAU*s] | Height [mAU] | Area %  |
|--------|---------------|------|-------------|--------------|--------------|---------|
| 1      | 7.918         | BB   | 0.2050      | 8338.28906   | 589.60474    | 97.0219 |
| 2      | 9.381         | BB   | 0.2431      | 255.94324    | 15.30842     | 2.9781  |

Totals : 8594.23230 604.91316

Results obtained with enhanced integrator!

\*\*\* End of Report \*\*\*



**Racemic 6**

Data File C:\HPCHEM\2\DATA\MANABU\4ME-RAC.D

Sample Name: 4Me-rac

```

=====
Injection Date   : 5/26/2007 5:59:16 PM
Sample Name     : 4Me-rac
Acq. Operator   : MANABU
Location        : Vial 2
Inj Volume      : 5 µl
Acq. Method     : C:\HPCHEM\2\METHODS\MANABU.M
Last changed    : 5/26/2007 5:58:14 PM by MANABU
                  (modified after loading)
Analysis Method : C:\HPCHEM\2\METHODS\MANABU.M
Last changed    : 5/26/2007 6:17:26 PM by MANABU
                  (modified after loading)
    
```

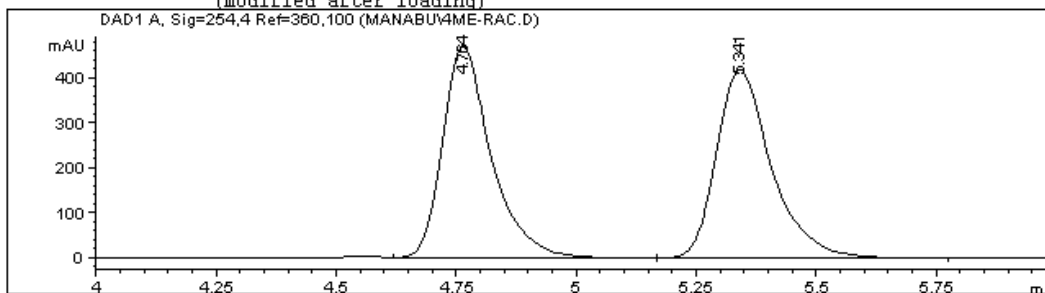

Area Percent Report

```

=====
Sorted By       : Signal
Multiplier      : 1.0000
Dilution        : 1.0000
Use Multiplier & Dilution Factor with ISTDs
    
```

Signal 1: DAD1 A, Sig=254,4 Ref=360,100

| Peak # | RetTime [min] | Type | Width [min] | Area [mAU*s] | Height [mAU] | Area %  |
|--------|---------------|------|-------------|--------------|--------------|---------|
| 1      | 4.764         | VV   | 0.1050      | 3371.96973   | 473.94806    | 50.0800 |
| 2      | 5.341         | VB   | 0.1214      | 3361.20166   | 419.86703    | 49.9200 |

Totals : 6733.17139 893.81509

Results obtained with enhanced integrator!

\*\*\* End of Report \*\*\*

### Enantioenriched 6

Data File C:\HPCHEM\2\DATA\MANABU\4ME.D

Sample Name: 4Me

```

=====
Injection Date : 5/26/2007 6:17:38 PM
Sample Name    : 4Me                      Location : Vial 3
Acq. Operator  : MANABU                   Inj Volume : 5 µl
Acq. Method    : C:\HPCHEM\2\METHODS\MANABU.M
Last changed   : 5/26/2007 6:27:01 PM by MANABU
                (modified after loading)
Analysis Method : C:\HPCHEM\2\METHODS\MANABU.M
Last changed   : 5/26/2007 6:32:31 PM by MANABU
                (modified after loading)
    
```

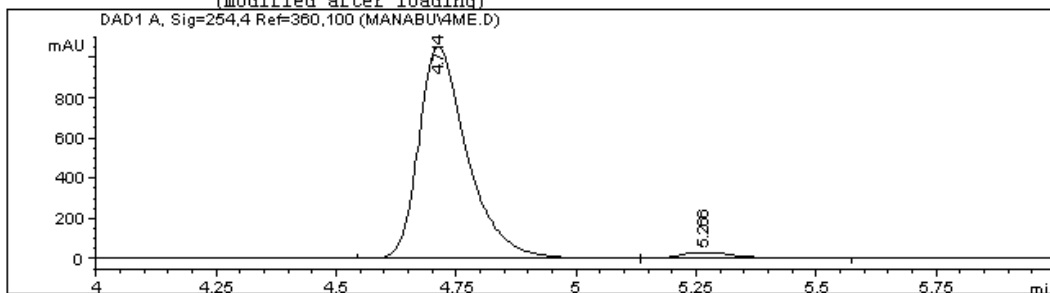

=====  
 Area Percent Report  
 =====

```

Sorted By      :      Signal
Multiplier     :      1.0000
Dilution       :      1.0000
Use Multiplier & Dilution Factor with ISTDs
    
```

Signal 1: DAD1 A, Sig=254,4 Ref=360,100

| Peak # | RetTime [min] | Type | Width [min] | Area [mAU*s] | Height [mAU] | Area %  |
|--------|---------------|------|-------------|--------------|--------------|---------|
| 1      | 4.714         | BV   | 0.1037      | 7399.76172   | 1057.30090   | 96.8361 |
| 2      | 5.266         | VP   | 0.1176      | 241.76926    | 30.79171     | 3.1639  |

Totals :                      7641.53098 1088.09261

Results obtained with enhanced integrator!

=====  
 \*\*\* End of Report \*\*\*

**Racemic 7**

Data File C:\HPCHEM\2\DATA\MANABU\3ME-RAC.D

Sample Name: 3Me-rac

```

=====
Injection Date   : 5/26/2007 5:40:46 PM
Sample Name     : 3Me-rac                      Location   : Vial 2
Acq. Operator   : MANABU
                                           Inj Volume : 10 µl
Acq. Method     : C:\HPCHEM\2\METHODS\MANABU.M
Last changed    : 5/26/2007 5:39:16 PM by MANABU
                  (modified after loading)
Analysis Method : C:\HPCHEM\2\METHODS\MANABU.M
Last changed    : 5/26/2007 5:57:44 PM by MANABU
                  (modified after loading)
    
```

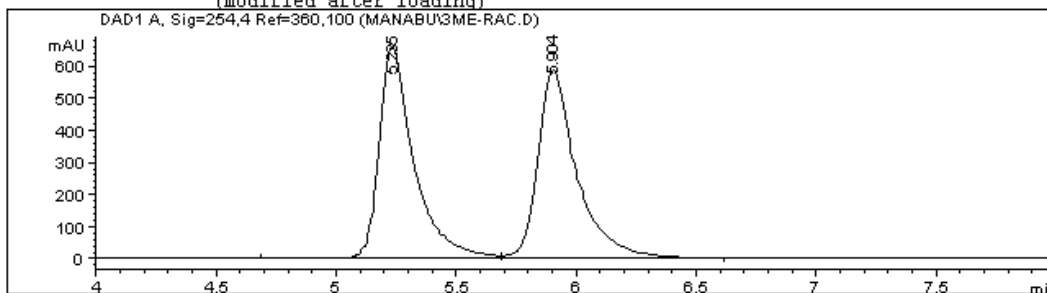

Area Percent Report

```

=====
Sorted By       : Signal
Multiplier      : 1.0000
Dilution        : 1.0000
Use Multiplier & Dilution Factor with ISTDs
    
```

Signal 1: DAD1 A, Sig=254,4 Ref=360,100

| Peak # | RetTime [min] | Type | Width [min] | Area [mAU*s] | Height [mAU] | Area %  |
|--------|---------------|------|-------------|--------------|--------------|---------|
| 1      | 5.235         | BV   | 0.1417      | 6559.88818   | 661.32617    | 49.9986 |
| 2      | 5.904         | VB   | 0.1629      | 6560.25537   | 584.67340    | 50.0014 |

Totals : 1.31201e4 1245.99957

Results obtained with enhanced integrator!

\*\*\* End of Report \*\*\*

**Enantioenriched 7**

Data File C:\HPCHEM\2\DATA\MANABU\MWII3ME2.D

Sample Name: MWII-3Me

3-Me

```

=====
Injection Date   : 5/22/2007 1:43:47 PM
Sample Name     : MWII-3Me
Acq. Operator   : MANABU
Location        : Vial 4l
Inj Volume      : 2 µl
Acq. Method     : C:\HPCHEM\2\METHODS\MANABU.M
Last changed    : 5/22/2007 1:45:02 PM by MANABU
                  (modified after loading)
Analysis Method : C:\HPCHEM\2\METHODS\ROB.M
Last changed    : 5/25/2007 11:12:16 AM by Rob
                  (modified after loading)
    
```

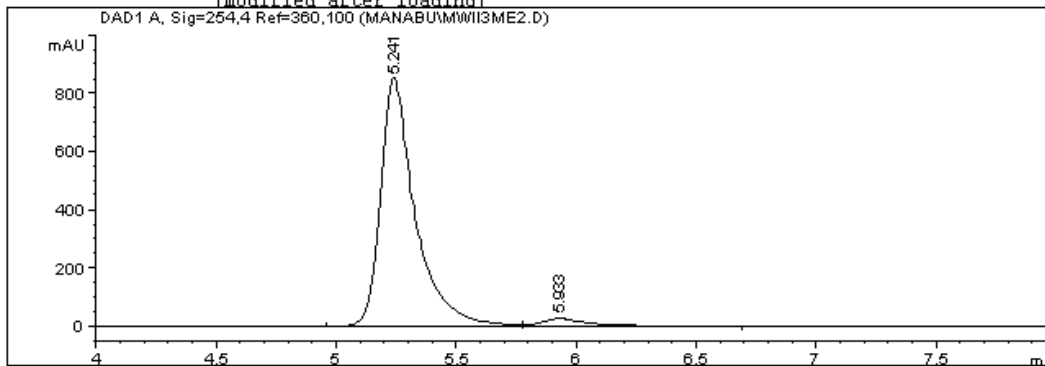

Area Percent Report

```

Sorted By      : Signal
Multiplier     : 1.0000
Dilution       : 1.0000
Use Multiplier & Dilution Factor with ISTDs
    
```

Signal 1: DAD1 A, Sig=254,4 Ref=360,100

| Peak # | RetTime [min] | Type | Width [min] | Area [mAU*s] | Height [mAU] | Area %  |
|--------|---------------|------|-------------|--------------|--------------|---------|
| 1      | 5.241         | VV   | 0.1464      | 8501.94336   | 852.08423    | 96.3348 |
| 2      | 5.933         | VB   | 0.1815      | 323.46936    | 25.59337     | 3.6652  |

Totals : 8825.41272 877.67760

Results obtained with enhanced integrator!

\*\*\* End of Report \*\*\*

**Racemic 8**

Data File C:\HPCHEM\2\DATA\MANABU\ET.D

Sample Name: Et

```

=====
Injection Date   : 4/26/2007 3:03:46 AM
Sample Name     : Et                               Location  : Vial 32
Acq. Operator   : MANABU
Inj Volume     : 2 µl
Acq. Method    : C:\HPCHEM\2\METHODS\MANABU.M
Last changed   : 4/2/2007 2:32:21 PM by MANABU
Analysis Method: C:\HPCHEM\2\METHODS\ROB.M
Last changed   : 5/14/2007 9:06:06 PM by Rob
                (modified after loading)

```

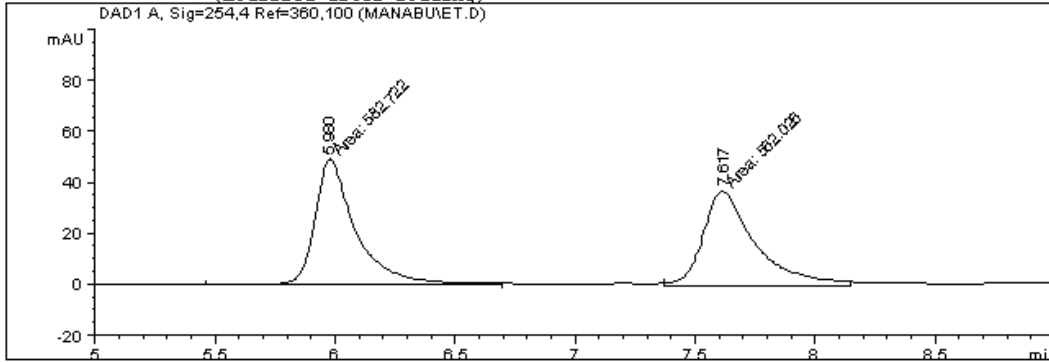

```

=====
                          Area Percent Report
=====

```

```

Sorted By       :      Signal
Multiplier     :      1.0000
Dilution       :      1.0000
Use Multiplier & Dilution Factor with ISTDs

```

Signal 1: DAD1 A, Sig=254,4 Ref=360,100

| Peak # | RetTime [min] | Type | Width [min] | Area [mAU*s] | Height [mAU] | Area %  |
|--------|---------------|------|-------------|--------------|--------------|---------|
| 1      | 5.980         | MM   | 0.1980      | 582.72223    | 49.03902     | 50.9039 |
| 2      | 7.617         | MM   | 0.2533      | 362.02637    | 36.97408     | 49.0961 |

Totals : 1144.74860 86.01310

Results obtained with enhanced integrator!

\*\*\* End of Report \*\*\*

### Enantioenriched 8

Data File C:\HPCHEM\2\DATA\MANABU\MWII-900.D

Sample Name: MWII-90

```

=====
Injection Date   : 2/26/2007 12:40:51 PM
Sample Name     : MWII-90
Acq. Operator   : MANABU
Location        : Vial 83
Inj Volume      : 2 µl
Acq. Method     : C:\HPCHEM\2\METHODS\MANABU.M
Last changed    : 1/27/2007 11:14:36 AM by MANABU
Analysis Method : C:\HPCHEM\2\METHODS\ROB.M
Last changed    : 5/14/2007 9:03:47 PM by Rob
                  (modified after loading)
    
```

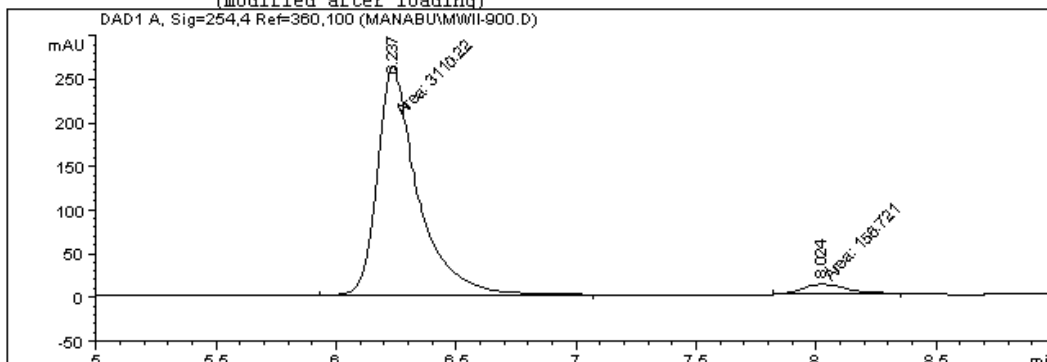

#### Area Percent Report

```

=====
Sorted By       : Signal
Multiplier      : 1.0000
Dilution        : 1.0000
Use Multiplier & Dilution Factor with ISTDs
    
```

Signal 1: DAD1 A, Sig=254,4 Ref=360,100

| Peak # | RetTime [min] | Type | Width [min] | Area [mAU*s] | Height [mAU] | Area %  |
|--------|---------------|------|-------------|--------------|--------------|---------|
| 1      | 6.237         | MM   | 0.1978      | 3110.22070   | 262.06119    | 95.2028 |
| 2      | 8.024         | MM   | 0.2246      | 156.72131    | 11.62845     | 4.7972  |

Totals : 3266.94202 273.68964

Results obtained with enhanced integrator!

\*\*\* End of Report \*\*\*

**Racemic 9**

Data File C:\HPCHEM\2\DATA\MANABU\MWII-560.D

Sample Name: MWII-56

allyl rac

```

=====
Injection Date : 2/12/2007 11:12:51 AM
Sample Name    : MWII-56                      Location : Vial 72
Acq. Operator  : MANABU                      Inj Volume : 2 µl
Acq. Method    : C:\HPCHEM\2\METHODS\MANABU.M
Last changed   : 2/12/2007 10:10:19 AM by MANABU
                (modified after loading)
Analysis Method : C:\HPCHEM\2\METHODS\ROB.M
Last changed   : 5/14/2007 8:44:37 PM by Rob
                (modified after loading)
    
```

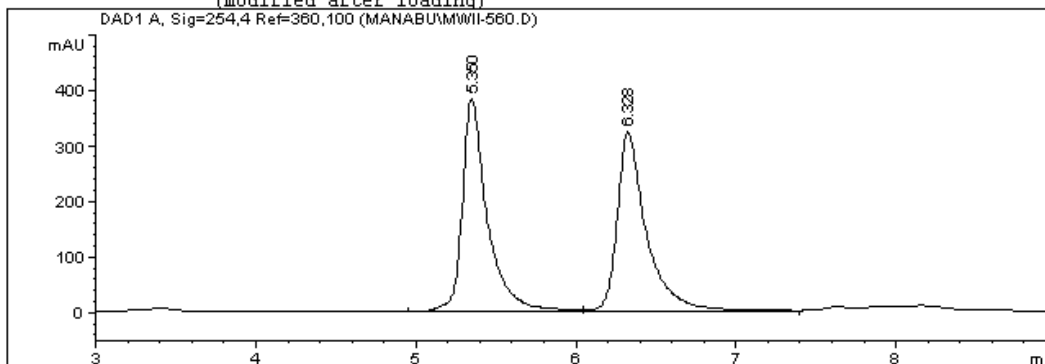

Area Percent Report

```

Sorted By      :      Signal
Multiplier     :      1.0000
Dilution      :      1.0000
Use Multiplier & Dilution Factor with ISTDs
    
```

Signal 1: DAD1 A, Sig=254,4 Ref=360,100

| Peak # | RetTime [min] | Type | Width [min] | Area [mAU*s] | Height [mAU] | Area %  |
|--------|---------------|------|-------------|--------------|--------------|---------|
| 1      | 5.350         | BV   | 0.1561      | 4137.13379   | 382.65686    | 50.3501 |
| 2      | 6.328         | VV   | 0.1840      | 4079.60181   | 321.51462    | 49.6499 |

Totals : 8216.73560 704.17148

Results obtained with enhanced integrator!

\*\*\* End of Report \*\*\*

**Enantioenriched 9**

Data File C:\HPCHEM\2\DATA\MANABU\MWII-570.D

Sample Name: MWII-57

allyl 1,2

```

=====
Injection Date : 2/12/2007 11:26:58 AM
Sample Name    : MWII-57                      Location : Vial 73
Acq. Operator  : MANABU                      Inj Volume : 2 µl
Acq. Method    : C:\HPCHEM\2\METHODS\MANABU.M
Last changed   : 2/12/2007 11:26:36 AM by MANABU
                (modified after loading)
Analysis Method : C:\HPCHEM\2\METHODS\ROB.M
Last changed   : 5/14/2007 8:45:06 PM by Rob
                (modified after loading)
    
```

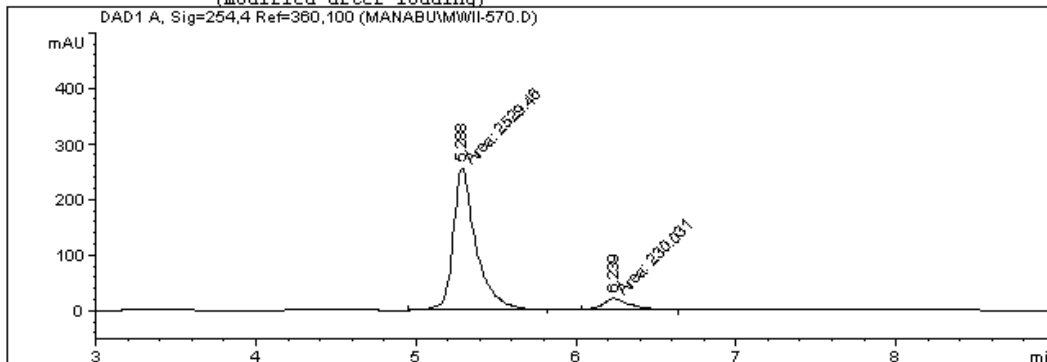

Area Percent Report

```

Sorted By      :      Signal
Multiplier     :      1.0000
Dilution       :      1.0000
Use Multiplier & Dilution Factor with ISTDs
    
```

Signal 1: DAD1 A, Sig=254,4 Ref=360,100

| Peak # | RetTime [min] | Type | Width [min] | Area [mAU*s] | Height [mAU] | Area %  |
|--------|---------------|------|-------------|--------------|--------------|---------|
| 1      | 5.288         | MM   | 0.1649      | 2529.45581   | 255.71126    | 91.6640 |
| 2      | 6.239         | MM   | 0.2023      | 230.03125    | 18.95047     | 8.3360  |

Totals : 2759.48706 274.66173

Results obtained with enhanced integrator!

\*\*\* End of Report \*\*\*



**Racemic 10**

Data File C:\HPCHEM\2\DATA\MANABU\MWII-ME.D

Sample Name: Me

```

=====
Injection Date   : 5/30/2007 4:16:27 AM
Sample Name     : Me                               Location  : Vial 4
Acq. Operator   : MANABU                          Inj Volume : 2 µl
Acq. Method     : C:\HPCHEM\2\METHODS\MANABU.M
Last changed    : 5/30/2007 4:15:39 AM by MANABU
                 (modified after loading)
Analysis Method : C:\HPCHEM\2\METHODS\MANABU.M
Last changed    : 5/30/2007 4:38:44 AM by MANABU
                 (modified after loading)
    
```

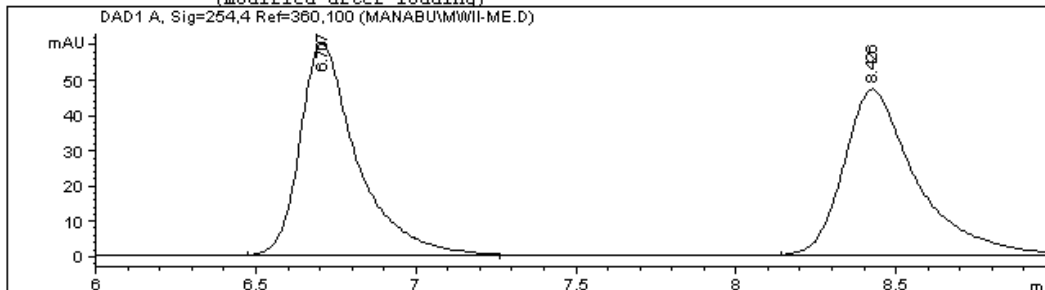

Area Percent Report

```

=====
Sorted By       :      Signal
Multiplier      :      1.0000
Dilution        :      1.0000
Use Multiplier & Dilution Factor with ISTDs
    
```

Signal 1: DAD1 A, Sig=254,4 Ref=360,100

| Peak # | RetTime [min] | Type | Width [min] | Area [mAU*s] | Height [mAU] | Area %  |
|--------|---------------|------|-------------|--------------|--------------|---------|
| 1      | 6.707         | BB   | 0.1802      | 743.91437    | 60.18658     | 49.9250 |
| 2      | 8.426         | BB   | 0.2306      | 746.15057    | 47.16357     | 50.0750 |

Totals : 1490.06494 107.35015

Results obtained with enhanced integrator!

\*\*\* End of Report \*\*\*

### Enantioenriched 10

Data File C:\HPCHEM\2\DATA\MANABU\MWII-880.D

Sample Name: MWII-89

```

=====
Injection Date   : 2/26/2007 11:54:06 AM
Sample Name     : MWII-89                      Location   : Vial 81
Acq. Operator   : MANABU                      Inj Volume : 2 µl
Acq. Method    : C:\HPCHEM\2\METHODS\MANABU.M
Last changed   : 1/27/2007 11:14:36 AM by MANABU
Analysis Method: C:\HPCHEM\2\METHODS\ROB.M
Last changed   : 5/14/2007 8:57:19 PM by Rob
                (modified after loading)
    
```

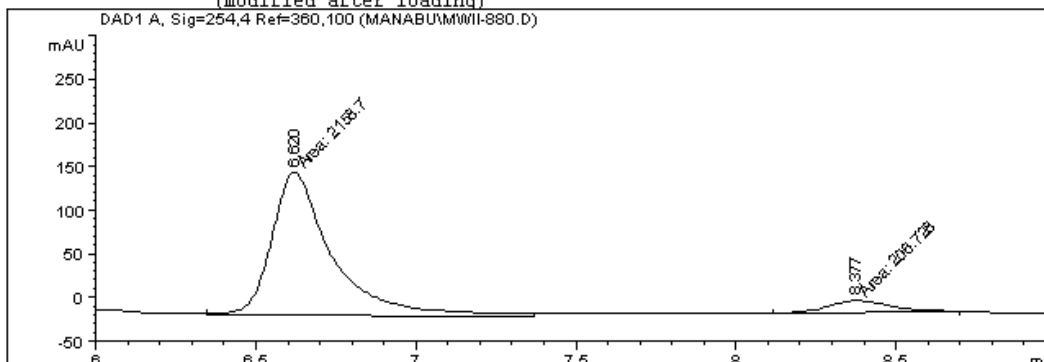

#### Area Percent Report

```

=====
Sorted By       : Signal
Multiplier     : 1.0000
Dilution       : 1.0000
Use Multiplier & Dilution Factor with ISTDs
    
```

Signal 1: DAD1 A, Sig=254,4 Ref=360,100

| Peak # | RetTime [min] | Type | Width [min] | Area [mAU*s] | Height [mAU] | Area %  |
|--------|---------------|------|-------------|--------------|--------------|---------|
| 1      | 6.620         | MM   | 0.2199      | 2158.69653   | 163.63376    | 91.2604 |
| 2      | 8.377         | MM   | 0.2434      | 206.72845    | 14.15574     | 8.7396  |

Totals : 2365.42499 177.78950

Results obtained with enhanced integrator!

\*\*\* End of Report \*\*\*

**Racemic 11**

Data File C:\HPCHEM\2\DATA\MANABU\CHCHPH.D

Sample Name: CHCHPH

```

=====
Injection Date : 4/26/2007 2:35:10 AM
Sample Name : CHCHPH
Acq. Operator : MANABU
Location : Vial 31
Inj Volume : 2 µl
Acq. Method : C:\HPCHEM\2\METHODS\MANABU.M
Last changed : 4/2/2007 2:32:21 PM by MANABU
Analysis Method : C:\HPCHEM\2\METHODS\ROB.M
Last changed : 5/14/2007 9:08:31 PM by Rob
                (modified after loading)
    
```

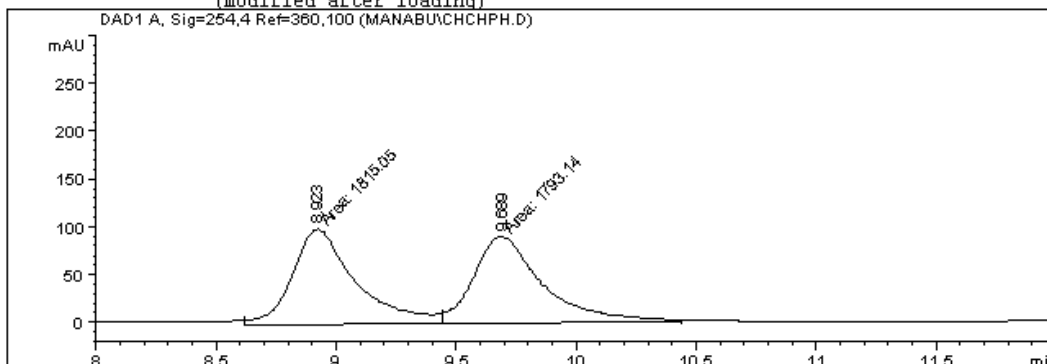

Area Percent Report

```

Sorted By : Signal
Multiplier : 1.0000
Dilution : 1.0000
Use Multiplier & Dilution Factor with ISTDs
    
```

Signal 1: DAD1 A, Sig=254,4 Ref=360,100

| Peak # | RetTime [min] | Type | Width [min] | Area [mAU*s] | Height [mAU] | Area %  |
|--------|---------------|------|-------------|--------------|--------------|---------|
| 1      | 8.923         | MF   | 0.3052      | 1815.04565   | 99.11434     | 50.3035 |
| 2      | 9.689         | FM   | 0.3307      | 1793.14380   | 90.37606     | 49.6965 |

Totals : 3608.18945 189.49040

Results obtained with enhanced integrator!

\*\*\* End of Report \*\*\*

### Enantioenriched 11

Data File C:\HPCHEM\2\DATA\MANABU\CHCHPH20.D

Sample Name: CHCHPH2

```

=====
Injection Date   : 4/17/2007 10:57:10 AM
Sample Name     : CHCHPH2                      Location : Vial 73
Acq. Operator   : MANABU                      Inj Volume : 5 µl
Acq. Method     : C:\HPCHEM\2\METHODS\MANABU.M
Last changed    : 4/17/2007 10:55:13 AM by MANABU
                  (modified after loading)
Analysis Method : C:\HPCHEM\2\METHODS\ROB.M
Last changed    : 5/14/2007 9:08:31 PM by Rob
                  (modified after loading)
    
```

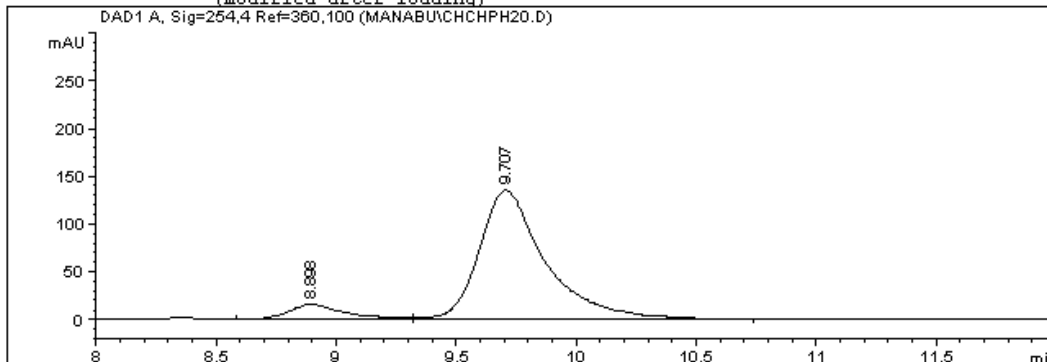

#### Area Percent Report

```

=====
Sorted By      :      Signal
Multiplier     :      1.0000
Dilution       :      1.0000
Use Multiplier & Dilution Factor with ISTDs
    
```

Signal 1: DAD1 A, Sig=254,4 Ref=360,100

| Peak # | RetTime [min] | Type | Width [min] | Area [mAU*s] | Height [mAU] | Area %  |
|--------|---------------|------|-------------|--------------|--------------|---------|
| 1      | 8.898         | VV   | 0.2469      | 258.08749    | 15.29082     | 9.0493  |
| 2      | 9.707         | VB   | 0.2806      | 2593.92944   | 134.75366    | 90.9507 |

Totals :                                    2852.01694  150.04449

Results obtained with enhanced integrator!

\*\*\* End of Report \*\*\*

**Racemic 12**

Data File C:\HPCHEM\2\DATA\MANABU\FORPAP-1\ALIPRACE.D

Sample Name: aliprace

```

=====
Injection Date   : 4/26/2007 10:32:26 AM
Sample Name     : aliprace                      Location   : Vial 75
Acq. Operator   : MANABU
                                           Inj Volume : 10 µl
Acq. Method     : C:\HPCHEM\2\METHODS\MANABU.M
Last changed    : 4/26/2007 10:22:52 AM by MANABU
                  (modified after loading)
Analysis Method : C:\HPCHEM\2\METHODS\ROB.M
Last changed    : 5/25/2007 11:06:54 AM by Rob
                  (modified after loading)
    
```

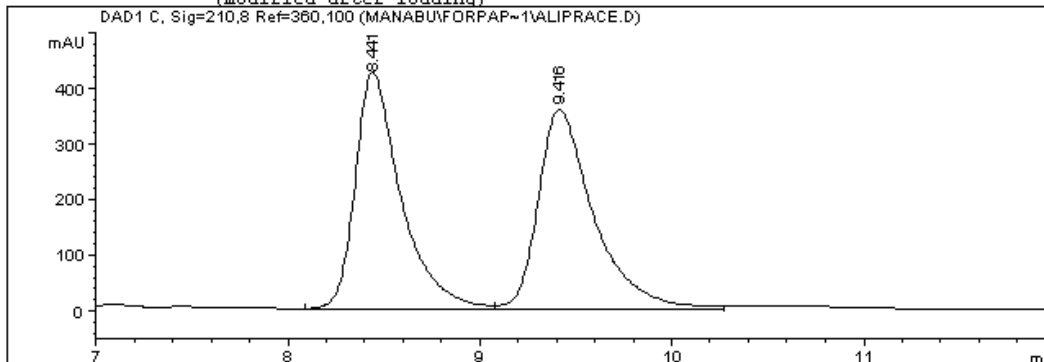

Area Percent Report

```

=====
Sorted By       : Signal
Multiplier     : 1.0000
Dilution       : 1.0000
Use Multiplier & Dilution Factor with ISTDs
    
```

Signal 1: DAD1 C, Sig=210,8 Ref=360,100

| Peak # | RetTime [min] | Type | Width [min] | Area [mAU*s] | Height [mAU] | Area %  |
|--------|---------------|------|-------------|--------------|--------------|---------|
| 1      | 8.441         | PV   | 0.2398      | 7003.30420   | 426.06577    | 49.5754 |
| 2      | 9.416         | VB   | 0.2944      | 7123.26172   | 357.64194    | 50.4246 |

Totals : 1.41266e4 783.70770

Results obtained with enhanced integrator!

\*\*\* End of Report \*\*\*

**Enantioenriched 12**

Data File C:\HPCHEM\2\DATA\MANABU\FORPAP-1\ALIPE.D

Sample Name: aliipe

```

=====
Injection Date   : 4/26/2007 10:52:32 AM
Sample Name     : aliipe                      Location : Vial 74
Acq. Operator   : MANABU
                                           Inj Volume : 10 µl
Acq. Method     : C:\HPCHEM\2\METHODS\MANABU.M
Last changed    : 4/26/2007 10:22:52 AM by MANABU
                  (modified after loading)
Analysis Method : C:\HPCHEM\2\METHODS\MMB LC.M
Last changed    : 5/15/2007 10:21:27 AM by mmb
                  (modified after loading)
    
```

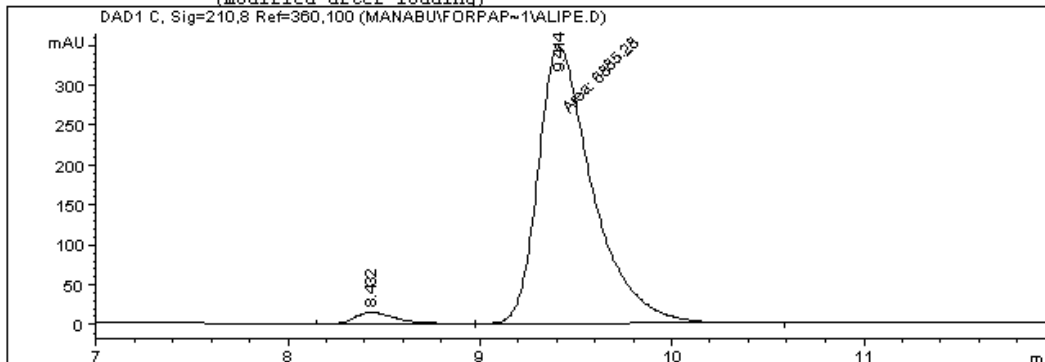

Area Percent Report

```

=====
Sorted By       : Signal
Multiplier     : 1.0000
Dilution       : 1.0000
Use Multiplier & Dilution Factor with ISTDs
    
```

Signal 1: DAD1 C, Sig=210,8 Ref=360,100

| Peak # | RetTime [min] | Type | Width [min] | Area [mAU*s] | Height [mAU] | Area %  |
|--------|---------------|------|-------------|--------------|--------------|---------|
| 1      | 8.432         | VP   | 0.2282      | 236.96541    | 15.34524     | 3.3271  |
| 2      | 9.414         | MM   | 0.3300      | 6885.28369   | 347.73145    | 96.6729 |

Totals : 7122.24910 363.07669

Results obtained with enhanced integrator!

\*\*\* End of Report \*\*\*

**Racemic 13**

Data File C:\HPCHEM\1\DATA\BRIANA\025F0101.D

Sample Name: MWII

```

=====
Injection Date : 5/5/07 2:49:05 PM          Seq. Line : 1
Sample Name    : MWII                      Location  : Vial 25
Acq. Operator  : BTA                       Inj      : 1
                                           Inj Volume : 3 µl

Acq. Method   : C:\HPCHEM\1\METHODS\MW.M
Last changed  : 11/6/06 3:23:49 PM by Briana
Analysis Method : C:\HPCHEM\1\METHODS\MW.M
Last changed  : 5/5/07 3:41:14 PM by BTA
                (modified after loading)
    
```

To separate enantiomers of sec-phenethyl alcohol

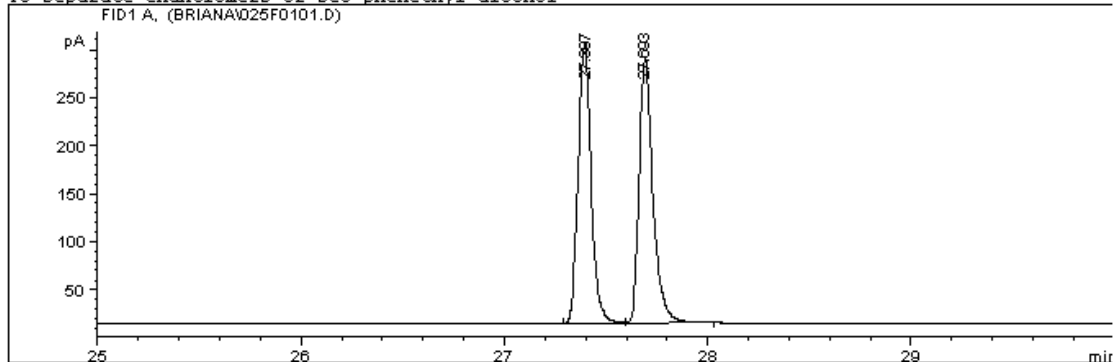

Area Percent Report

```

Sorted By      : Signal
Multiplier     : 1.0000
Dilution       : 1.0000
    
```

Signal 1: FID1 A,

| Peak # | RetTime [min] | Type | Width [min] | Area [pA*s] | Height [pA] | Area %   |
|--------|---------------|------|-------------|-------------|-------------|----------|
| 1      | 27.397        | PV   | 0.0656      | 1291.62000  | 289.49869   | 49.90987 |
| 2      | 27.693        | VB   | 0.0664      | 1296.28491  | 275.24738   | 50.09013 |

Totals : 2587.90491 564.74606

Results obtained with enhanced integrator!

\*\*\* End of Report \*\*\*

**Enantioenriched 13**

Data File C:\HPCHEM\1\DATA\BRIANA\020F0101.D

Sample Name: MWII-chi

```

=====
Injection Date   : 5/5/07 3:36:15 PM           Seq. Line :    1
Sample Name     : MWII-chi                     Location  : Vial 20
Acq. Operator   : BTA                          Inj       :    1
                                           Inj Volume: 3 µl

Sequence File   : C:\HPCHEM\1\SEQUENCE\APEL.S
Acq. Method     : C:\HPCHEM\1\METHODS\MW.M
Last changed    : 5/5/07 3:41:14 PM by BTA
                  (modified after loading)
Analysis Method : C:\HPCHEM\1\METHODS\MW.M
Last changed    : 5/5/07 4:19:50 PM by BTA
                  (modified after loading)
    
```

To separate enantiomers of sec-phenethyl alcohol

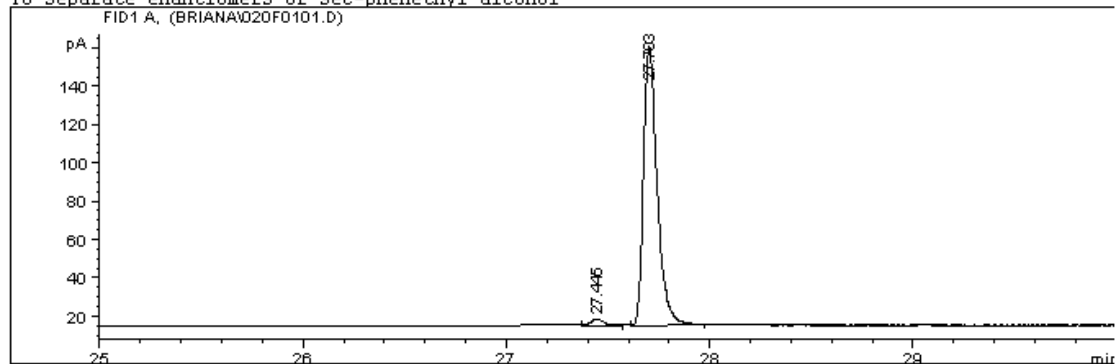

Area Percent Report

```

Sorted By      :      Signal
Multiplier     :      1.0000
Dilution       :      1.0000
    
```

Signal 1: FID1 A,

| Peak # | RetTime [min] | Type | Width [min] | Area [pA*s] | Height [pA] | Area %   |
|--------|---------------|------|-------------|-------------|-------------|----------|
| 1      | 27.445        | BB   | 0.0562      | 12.20981    | 2.83643     | 1.77708  |
| 2      | 27.703        | PB   | 0.0648      | 674.86255   | 144.97050   | 98.22292 |

Totals : 687.07236 147.80693

Results obtained with enhanced integrator!

\*\*\* End of Report \*\*\*
